# Supplementary material for: Wide-Targeted Semi-Quantitative Analysis of Acidic Glycosphingolipids in Cell Lines and Urine to Develop Potential Screening Biomarkers for Renal Cell Carcinoma
Source: MDPI journal article supplement (doi:10.3390/ijms25074098), 2024-04-07
Supplement: s1 [file s1]

Table S4 Matrix factor of GD1a (d18:1/18:0) using the ACHN cell medium.

|                   | The peak area in 10 ng/mL<br>Standard solution<br>(counts) | The peak area in ACHN Cell<br>medium<br>(counts) | The peak area of 10 ng/mL<br>Standard solution spiked in<br>ACHN Cell medium<br>(counts) | Matrix<br>factor<br>(%) |
|-------------------|------------------------------------------------------------|--------------------------------------------------|------------------------------------------------------------------------------------------|-------------------------|
| GD1a (d18:1/18:0) | 1157865                                                    | 264968                                           | 1486623                                                                                  | 106                     |
