# Supplementary material for: Wide-Targeted Semi-Quantitative Analysis of Acidic Glycosphingolipids in Cell Lines and Urine to Develop Potential Screening Biomarkers for Renal Cell Carcinoma
Source: MDPI journal article supplement (doi:10.3390/ijms25074098), 2024-04-07
Supplement: s1 [file s1]

Table S2 MS/MS and ion source parameters for GSLs analysis.

(a) MS/MS parameters for wide targeted GSL analysis

| Compound     | The number of<br>NeuAc | DP<br>(V) | EP<br>(V) | CE<br>(V) | CXP<br>(V) |
|--------------|------------------------|-----------|-----------|-----------|------------|
| MSGb5        | 1                      | -65       | -6        | -80       | -9         |
| GM3          |                        |           |           |           |            |
| GM2          |                        |           |           |           |            |
| GM1/DUPAN-2  |                        |           |           |           |            |
| CA19-9       | 2                      | -65       | -6        | -50       | -9         |
| DSGb5        |                        |           |           |           |            |
| GD1a/DSLc4   |                        |           |           |           |            |
| GalNAcDSLc4  |                        |           |           |           |            |
| Speculated 1 |                        |           |           |           |            |
| Speculated 2 |                        |           |           |           |            |

CE, collision energy; CXP, collision cell exit potential; DP, declustering potential; EP, entrance potential.

(b) Ion source parameters for wide targeted GSL analysis

| CUR   | CAD    | ISV   | TEM  | GS1   | GS2   |
|-------|--------|-------|------|-------|-------|
| (psi) | (unit) | (V)   | (°C) | (psi) | (psi) |
| 10    | 12     | -4500 | 500  | 60    | 60    |

CAD, collision gas; CUR, curtain gas; GS, ion source gas; ISV, ionspray voltage; TEM, turbo gas temperature.
