# Supplementary material for: Wide-Targeted Semi-Quantitative Analysis of Acidic Glycosphingolipids in Cell Lines and Urine to Develop Potential Screening Biomarkers for Renal Cell Carcinoma
Source: MDPI journal article supplement (doi:10.3390/ijms25074098), 2024-04-07
Supplement: s1 [file s1]

Table S6. Summary of GSL peaks detected in the cell lines.

(a) Peak number of GSLs in cells.

|      | Not detected<br>(n) | Detected<br>(n) |
|------|---------------------|-----------------|
| HK-2 | 52                  | 223             |
| ACHN | 2                   | 273             |

(b) Peak number of GSLs in the medium.

|      | Not detected<br>(n) | Detected<br>(n) |
|------|---------------------|-----------------|
| HK-2 | 71                  | 204             |
| ACHN | 68                  | 207             |

(c) Peak number of changes between HK-2 and ACHN media.

|           | Cells<br>(n) | Medium<br>(n) |
|-----------|--------------|---------------|
| Decreased | 3            | 121           |
| Unchanged | 0            | 1             |
| Increased | 223          | 82            |

Decreased means the peak ratio of GSLs in ACHN/HK-2 less than 100%, “Unchanged” means the peak ratio of GSLs in ACHN/HK-2 100%, “Increased” means the peak ratio of GSLs in ACHN/HK-2 more than 100%.

(d) Intense peak number of GSLs in the medium.

|      | The peak with more than<br>100,000 counts/cells<br>(n) | The peak with more than<br>2,000,000 counts/cells<br>(n) |
|------|--------------------------------------------------------|----------------------------------------------------------|
| HK-2 | 42                                                     | 4                                                        |
| ACHN | 36                                                     | 4                                                        |
