# Supplementary material for: Wide-Targeted Semi-Quantitative Analysis of Acidic Glycosphingolipids in Cell Lines and Urine to Develop Potential Screening Biomarkers for Renal Cell Carcinoma
Source: MDPI journal article supplement (doi:10.3390/ijms25074098), 2024-04-07
Supplement: s1 [file s1]

Table S5. GSL analysis results for cell lines using wide-targeted GSL analysis.

(a) The peak areas and the ratio of GSL peaks in HK-2 cells and ACHN cells.

| No. | Components          | Q1/Q3<br>( <i>m/z</i> ) | Cell HK-2<br>(counts/10 <sup>6</sup> cells) | Cell ACHN<br>(counts/10 <sup>6</sup> cells)) | Ratio ACHN to HK-2<br>(%) |
|-----|---------------------|-------------------------|---------------------------------------------|----------------------------------------------|---------------------------|
| 1   | CA19-9 (d18:1/0:0)  | 1424.7 / 290.1          | 0                                           | 16828                                        | <b>N.A.</b>               |
| 2   | CA19-9 (d18:1/16:0) | 1662.9 / 290.1          | 938                                         | 961                                          | <b>103%</b>               |
| 3   | CA19-9 (d18:1/18:0) | 1690.9 / 290.1          | 0                                           | 1682                                         | <b>N.A.</b>               |
| 4   | CA19-9 (d18:1/18:1) | 1688.9 / 290.1          | 0                                           | 2404                                         | <b>N.A.</b>               |
| 5   | CA19-9 (d18:1/18:2) | 1686.9 / 290.1          | 0                                           | 1444                                         | <b>N.A.</b>               |
| 6   | CA19-9 (d18:1/18:3) | 1684.9 / 290.1          | 0                                           | 961                                          | <b>N.A.</b>               |
| 7   | CA19-9 (d18:1/20:0) | 1719.0 / 290.1          | 0                                           | 961                                          | <b>N.A.</b>               |
| 8   | CA19-9 (d18:1/20:1) | 1716.9 / 290.1          | 0                                           | 1199                                         | <b>N.A.</b>               |
| 9   | CA19-9 (d18:1/20:2) | 1714.9 / 290.1          | 0                                           | 961                                          | <b>N.A.</b>               |
| 10  | CA19-9 (d18:1/20:3) | 1712.9 / 290.1          | 0                                           | 481                                          | <b>N.A.</b>               |
| 11  | CA19-9 (d18:1/20:4) | 1710.9 / 290.1          | 0                                           | 2164                                         | <b>N.A.</b>               |
| 12  | CA19-9 (d18:1/20:5) | 1708.9 / 290.1          | 1866                                        | 6008                                         | <b>322%</b>               |
| 13  | CA19-9 (d18:1/22:0) | 1747.0 / 290.1          | 0                                           | 1202                                         | <b>N.A.</b>               |
| 14  | CA19-9 (d18:1/22:1) | 1745.0 / 290.1          | 0                                           | 961                                          | <b>N.A.</b>               |
| 15  | CA19-9 (d18:1/22:2) | 1743.0 / 290.1          | 0                                           | 1201                                         | <b>N.A.</b>               |
| 16  | CA19-9 (d18:1/22:3) | 1740.9 / 290.1          | 0                                           | 0                                            | <b>N.A.</b>               |
| 17  | CA19-9 (d18:1/22:4) | 1738.9 / 290.1          | 0                                           | 961                                          | <b>N.A.</b>               |
| 18  | CA19-9 (d18:1/22:5) | 1736.9 / 290.1          | 0                                           | 961                                          | <b>N.A.</b>               |
| 19  | CA19-9 (d18:1/22:6) | 1734.9 / 290.1          | 0                                           | 1923                                         | <b>N.A.</b>               |

| No. | Components          | Q1/Q3<br>( <i>m/z</i> ) | Cell HK-2<br>(counts/10 <sup>6</sup> cells) | Cell ACHN<br>(counts/10 <sup>6</sup> cells)) | Ratio ACHN to HK-2<br>(%) |
|-----|---------------------|-------------------------|---------------------------------------------|----------------------------------------------|---------------------------|
| 20  | CA19-9 (d18:1/24:0) | 1775.0 / 290.1          | 0                                           | 1201                                         | <b>N.A.</b>               |
| 21  | CA19-9 (d18:1/24:1) | 1773.0 / 290.1          | 0                                           | 3124                                         | <b>N.A.</b>               |
| 22  | CA19-9 (d18:1/26:0) | 1803.1 / 290.1          | 0                                           | 2163                                         | <b>N.A.</b>               |
| 23  | CA19-9 (d18:1/28:0) | 1831.1 / 290.1          | 0                                           | 721                                          | <b>N.A.</b>               |
| 24  | CA19-9 (d18:1/30:0) | 1859.1 / 290.1          | 0                                           | 0                                            | <b>N.A.</b>               |
| 25  | DSGb5 (d18:1/0:0) 1 | 865.4 / 290.1           | 4184                                        | 465241                                       | <b>11119%</b>             |
| 26  | DSGb5 (d18:1/0:0) 2 | 865.4 / 290.1           | 104872                                      | 1028253                                      | <b>980%</b>               |
| 27  | DSGb5 (d18:1/0:0) 3 | 865.4 / 290.1           | 10727                                       | 671044                                       | <b>6256%</b>              |
| 28  | DSGb5 (d18:1/16:0)  | 984.5 / 290.1           | 22144663                                    | 56032660                                     | <b>253%</b>               |
| 29  | DSGb5 (d18:1/18:0)  | 998.5 / 290.1           | 1867691                                     | 11033419                                     | <b>591%</b>               |
| 30  | DSGb5 (d18:1/18:1)  | 997.5 / 290.1           | 67872                                       | 632994                                       | <b>933%</b>               |
| 31  | DSGb5 (d18:1/18:2)  | 996.5 / 290.1           | 460656                                      | 909345                                       | <b>197%</b>               |
| 32  | DSGb5 (d18:1/18:3)  | 995.5 / 290.1           | 962763                                      | 1886512                                      | <b>196%</b>               |
| 33  | DSGb5 (d18:1/20:0)  | 1012.5 / 290.1          | 922063                                      | 6382497                                      | <b>692%</b>               |
| 34  | DSGb5 (d18:1/20:1)  | 1011.5 / 290.1          | 271704                                      | 1276628                                      | <b>470%</b>               |
| 35  | DSGb5 (d18:1/20:2)  | 1010.5 / 290.1          | 0                                           | 548261                                       | <b>N.A.</b>               |
| 36  | DSGb5 (d18:1/20:3)  | 1009.5 / 290.1          | 101816                                      | 837621                                       | <b>823%</b>               |
| 37  | DSGb5 (d18:1/20:4)  | 1008.5 / 290.1          | 2104                                        | 71994                                        | <b>3422%</b>              |
| 38  | DSGb5 (d18:1/20:5)  | 1007.5 / 290.1          | 83673                                       | 148404                                       | <b>177%</b>               |
| 39  | DSGb5 (d18:1/22:0)  | 1026.5 / 290.1          | 4144129                                     | 30136140                                     | <b>727%</b>               |

| No. | Components                    | Q1/Q3<br>( <i>m/z</i> ) | Cell HK-2<br>(counts/10 <sup>6</sup> cells) | Cell ACHN<br>(counts/10 <sup>6</sup> cells)) | Ratio ACHN to HK-2<br>(%) |
|-----|-------------------------------|-------------------------|---------------------------------------------|----------------------------------------------|---------------------------|
| 40  | DSGb5 (d18:1/22:1)            | 1025.5 / 290.1          | 1813228                                     | 12480051                                     | <b>688%</b>               |
| 41  | DSGb5 (d18:1/22:2)            | 1024.5 / 290.1          | 286602                                      | 806247                                       | <b>281%</b>               |
| 42  | DSGb5 (d18:1/22:3)            | 1023.5 / 290.1          | 52591                                       | 323719                                       | <b>616%</b>               |
| 43  | DSGb5 (d18:1/22:4)            | 1022.5 / 290.1          | 16038                                       | 101428                                       | <b>632%</b>               |
| 44  | DSGb5 (d18:1/22:5)            | 1021.5 / 290.1          | 8977                                        | 120438                                       | <b>1342%</b>              |
| 45  | DSGb5 (d18:1/22:6)            | 1020.5 / 290.1          | 51499                                       | 362595                                       | <b>704%</b>               |
| 46  | DSGb5 (d18:1/24:0) 1          | 1040.6 / 290.1          | 6376444                                     | 25571015                                     | <b>401%</b>               |
| 47  | DSGb5 (d18:1/24:0) 2          | 1040.6 / 290.1          | 6191572                                     | 39235054                                     | <b>634%</b>               |
| 48  | DSGb5 (d18:1/24:1) 1          | 1039.5 / 290.1          | 1682279                                     | 6328533                                      | <b>376%</b>               |
| 49  | DSGb5 (d18:1/24:1) 2          | 1039.5 / 290.1          | 14504290                                    | 52454845                                     | <b>362%</b>               |
| 50  | DSGb5 (d18:1/26:0) 1          | 1054.6 / 290.1          | 276755                                      | 2365213                                      | <b>855%</b>               |
| 51  | DSGb5 (d18:1/26:0) 2          | 1054.6 / 290.1          | 132632                                      | 2117141                                      | <b>1596%</b>              |
| 52  | DSGb5 (d18:1/28:0)            | 1068.6 / 290.1          | 12923                                       | 31340                                        | <b>243%</b>               |
| 53  | DSGb5 (d18:1/30:0)            | 1082.6 / 290.1          | 4189                                        | 36594                                        | <b>874%</b>               |
| 54  | GalNAcDSLc4, RM2 (d18:1/0:0)  | 885.9 / 290.1           | 87550                                       | 267537                                       | <b>306%</b>               |
| 55  | GalNAcDSLc4, RM2 (d18:1/16:0) | 1005.0 / 290.1          | 70772                                       | 815625                                       | <b>1152%</b>              |
| 56  | GalNAcDSLc4, RM2 (d18:1/18:0) | 1019.0 / 290.1          | 73498                                       | 380358                                       | <b>518%</b>               |
| 57  | GalNAcDSLc4, RM2 (d18:1/18:1) | 1018.0 / 290.1          | 11246                                       | 182343                                       | <b>1621%</b>              |
| 58  | GalNAcDSLc4, RM2 (d18:1/18:2) | 1017.0 / 290.1          | 25616                                       | 323785                                       | <b>1264%</b>              |
| 59  | GalNAcDSLc4, RM2 (d18:1/18:3) | 1016.0 / 290.1          | 9279                                        | 111055                                       | <b>1197%</b>              |

| No. | Components                      | Q1/Q3<br>( <i>m/z</i> ) | Cell HK-2<br>(counts/10 <sup>6</sup> cells) | Cell ACHN<br>(counts/10 <sup>6</sup> cells)) | Ratio ACHN to HK-2<br>(%) |
|-----|---------------------------------|-------------------------|---------------------------------------------|----------------------------------------------|---------------------------|
| 60  | GalNAcDSLc4, RM2 (d18:1/20:0) 1 | 1033.0 / 290.1          | 1313089                                     | 5926848                                      | <b>451%</b>               |
| 61  | GalNAcDSLc4, RM2 (d18:1/20:0) 2 | 1033.0 / 290.1          | 423960                                      | 1899270                                      | <b>448%</b>               |
| 62  | GalNAcDSLc4, RM2 (d18:1/20:1)   | 1032.0 / 290.1          | 706396                                      | 2878341                                      | <b>407%</b>               |
| 63  | GalNAcDSLc4, RM2 (d18:1/20:2)   | 1031.0 / 290.1          | 47194                                       | 330206                                       | <b>700%</b>               |
| 64  | GalNAcDSLc4, RM2 (d18:1/20:3)   | 1030.0 / 290.1          | 26600                                       | 79439                                        | <b>299%</b>               |
| 65  | GalNAcDSLc4, RM2 (d18:1/20:4)   | 1029.0 / 290.1          | 91283                                       | 784508                                       | <b>859%</b>               |
| 66  | GalNAcDSLc4, RM2 (d18:1/20:5)   | 1028.0 / 290.1          | 849502                                      | 7437006                                      | <b>875%</b>               |
| 67  | GalNAcDSLc4, RM2 (d18:1/22:0) 1 | 1047.0 / 290.1          | 552120                                      | 2062564                                      | <b>374%</b>               |
| 68  | GalNAcDSLc4, RM2 (d18:1/22:0) 2 | 1047.0 / 290.1          | 108528                                      | 404395                                       | <b>373%</b>               |
| 69  | GalNAcDSLc4, RM2 (d18:1/22:1)   | 1046.0 / 290.1          | 269271                                      | 986679                                       | <b>366%</b>               |
| 70  | GalNAcDSLc4, RM2 (d18:1/22:2)   | 1045.0 / 290.1          | 110172                                      | 323958                                       | <b>294%</b>               |
| 71  | GalNAcDSLc4, RM2 (d18:1/22:3)   | 1044.0 / 290.1          | 84372                                       | 185761                                       | <b>220%</b>               |
| 72  | GalNAcDSLc4, RM2 (d18:1/22:4)   | 1043.0 / 290.1          | 127300                                      | 1091295                                      | <b>857%</b>               |
| 73  | GalNAcDSLc4, RM2 (d18:1/22:5) 1 | 1042.0 / 290.1          | 326087                                      | 1446688                                      | <b>444%</b>               |
| 74  | GalNAcDSLc4, RM2 (d18:1/22:5) 2 | 1042.0 / 290.1          | 1363818                                     | 10931696                                     | <b>802%</b>               |
| 75  | GalNAcDSLc4, RM2 (d18:1/22:6) 1 | 1041.0 / 290.1          | 3568511                                     | 15904736                                     | <b>446%</b>               |
| 76  | GalNAcDSLc4, RM2 (d18:1/22:6) 2 | 1041.0 / 290.1          | 5579133                                     | 38101626                                     | <b>683%</b>               |
| 77  | GalNAcDSLc4, RM2 (d18:1/24:0)   | 1061.1 / 290.1          | 31616                                       | 462449                                       | <b>1463%</b>              |
| 78  | GalNAcDSLc4, RM2 (d18:1/24:1)   | 1060.1 / 290.1          | 33867                                       | 635953                                       | <b>1878%</b>              |
| 79  | GalNAcDSLc4, RM2 (d18:1/26:0)   | 1075.1 / 290.1          | 9807                                        | 24522                                        | <b>250%</b>               |

| No. | Components                    | Q1/Q3<br>( <i>m/z</i> ) | Cell HK-2<br>(counts/10 <sup>6</sup> cells) | Cell ACHN<br>(counts/10 <sup>6</sup> cells)) | Ratio ACHN to HK-2<br>(%) |
|-----|-------------------------------|-------------------------|---------------------------------------------|----------------------------------------------|---------------------------|
| 80  | GalNAcDSLc4, RM2 (d18:1/28:0) | 1089.1 / 290.1          | 10554                                       | 30558                                        | <b>290%</b>               |
| 81  | GalNAcDSLc4, RM2 (d18:1/30:0) | 1103.1 / 290.1          | 30855                                       | 245794                                       | <b>797%</b>               |
| 82  | GD1a (d18:1/0:0)              | 784.3 / 290.1           | 0                                           | 585343                                       | <b>N.A.</b>               |
| 83  | GD1a (d18:1/16:0)             | 903.5 / 290.1           | 18405655                                    | 63951269                                     | <b>347%</b>               |
| 84  | GD1a (d18:1/18:0)             | 917.5 / 290.1           | 2078299                                     | 8939450                                      | <b>430%</b>               |
| 85  | GD1a (d18:1/18:1) 1           | 916.5 / 290.1           | 364657                                      | 939568                                       | <b>258%</b>               |
| 86  | GD1a (d18:1/18:1) 2           | 916.5 / 290.1           | 161013                                      | 603723                                       | <b>375%</b>               |
| 87  | GD1a (d18:1/18:1) 3           | 916.5 / 290.1           | 135446                                      | 697406                                       | <b>515%</b>               |
| 88  | GD1a (d18:1/18:2) 1           | 915.5 / 290.1           | 187718                                      | 593506                                       | <b>316%</b>               |
| 89  | GD1a (d18:1/18:2) 2           | 915.5 / 290.1           | 329476                                      | 1765555                                      | <b>536%</b>               |
| 90  | GD1a (d18:1/18:3)             | 914.5 / 290.1           | 424212                                      | 1578221                                      | <b>372%</b>               |
| 91  | GD1a (d18:1/20:0)             | 931.5 / 290.1           | 859977                                      | 5628198                                      | <b>654%</b>               |
| 92  | GD1a (d18:1/20:1)             | 930.5 / 290.1           | 206430                                      | 1157868                                      | <b>561%</b>               |
| 93  | GD1a (d18:1/20:2)             | 929.5 / 290.1           | 32666                                       | 163966                                       | <b>502%</b>               |
| 94  | GD1a (d18:1/20:3)             | 928.5 / 290.1           | 61276                                       | 284039                                       | <b>464%</b>               |
| 95  | GD1a (d18:1/20:4)             | 927.5 / 290.1           | 5261                                        | 226438                                       | <b>4304%</b>              |
| 96  | GD1a (d18:1/20:5)             | 926.5 / 290.1           | 59344                                       | 107529                                       | <b>181%</b>               |
| 97  | GD1a (d18:1/22:0) 1           | 945.5 / 290.1           | 466512                                      | 4747651                                      | <b>1018%</b>              |
| 98  | GD1a (d18:1/22:0) 2           | 945.5 / 290.1           | 3493311                                     | 30233435                                     | <b>865%</b>               |
| 99  | GD1a (d18:1/22:1) 1           | 944.5 / 290.1           | 0                                           | 979304                                       | <b>N.A.</b>               |

| No. | Components          | Q1/Q3<br>(m/z) | Cell HK-2<br>(counts/10 <sup>6</sup> cells) | Cell ACHN<br>(counts/10 <sup>6</sup> cells)) | Ratio ACHN to HK-2<br>(%) |
|-----|---------------------|----------------|---------------------------------------------|----------------------------------------------|---------------------------|
| 100 | GD1a (d18:1/22:1) 2 | 944.5 / 290.1  | 1245983                                     | 11346404                                     | <b>911%</b>               |
| 101 | GD1a (d18:1/22:1) 3 | 944.5 / 290.1  | 132189                                      | 1749622                                      | <b>1324%</b>              |
| 102 | GD1a (d18:1/22:2)   | 943.5 / 290.1  | 2335                                        | 2819946                                      | <b>120750%</b>            |
| 103 | GD1a (d18:1/22:3)   | 942.5 / 290.1  | 14365                                       | 590109                                       | <b>4108%</b>              |
| 104 | GD1a (d18:1/22:4)   | 941.5 / 290.1  | 109298                                      | 1465852                                      | <b>1341%</b>              |
| 105 | GD1a (d18:1/22:5)   | 940.5 / 290.1  | 22296                                       | 611749                                       | <b>2744%</b>              |
| 106 | GD1a (d18:1/22:6)   | 939.5 / 290.1  | 33738                                       | 361889                                       | <b>1073%</b>              |
| 107 | GD1a (d18:1/24:0) 1 | 959.5 / 290.1  | 4123877                                     | 19292435                                     | <b>468%</b>               |
| 108 | GD1a (d18:1/24:0) 2 | 959.5 / 290.1  | 4842411                                     | 40530077                                     | <b>837%</b>               |
| 109 | GD1a (d18:1/24:1) 1 | 958.5 / 290.1  | 820287                                      | 4621854                                      | <b>563%</b>               |
| 110 | GD1a (d18:1/24:1) 2 | 958.5 / 290.1  | 10029584                                    | 47487629                                     | <b>473%</b>               |
| 111 | GD1a (d18:1/24:1) 3 | 958.5 / 290.1  | 138961                                      | 1902813                                      | <b>1369%</b>              |
| 112 | GD1a (d18:1/26:0) 1 | 973.5 / 290.1  | 199011                                      | 2337680                                      | <b>1175%</b>              |
| 113 | GD1a (d18:1/26:0) 2 | 973.5 / 290.1  | 107490                                      | 1929916                                      | <b>1795%</b>              |
| 114 | GD1a (d18:1/28:0)   | 987.6 / 290.1  | 104921                                      | 263451                                       | <b>251%</b>               |
| 115 | GD1a (d18:1/30:0)   | 1001.6 / 290.1 | 956                                         | 221441                                       | <b>23161%</b>             |
| 116 | GM1 (d18:1/0:0)     | 1278.6 / 290.1 | 1377                                        | 15673                                        | <b>1138%</b>              |
| 117 | GM1 (d18:1/16:0)    | 1516.8 / 290.1 | 41752                                       | 160289                                       | <b>384%</b>               |
| 118 | GM1 (d18:1/18:0)    | 1544.9 / 290.1 | 5627                                        | 14658                                        | <b>261%</b>               |
| 119 | GM1 (d18:1/18:1)    | 1542.9 / 290.1 | 0                                           | 4646                                         | <b>N.A.</b>               |

| No. | Components       | Q1/Q3<br>(m/z) | Cell HK-2<br>(counts/10 <sup>6</sup> cells) | Cell ACHN<br>(counts/10 <sup>6</sup> cells)) | Ratio ACHN to HK-2<br>(%) |
|-----|------------------|----------------|---------------------------------------------|----------------------------------------------|---------------------------|
| 120 | GM1 (d18:1/18:2) | 1540.8 / 290.1 | 0                                           | 6746                                         | <b>N.A.</b>               |
| 121 | GM1 (d18:1/18:3) | 1538.8 / 290.1 | 938                                         | 9600                                         | <b>1024%</b>              |
| 122 | GM1 (d18:1/20:0) | 1572.9 / 290.1 | 0                                           | 4325                                         | <b>N.A.</b>               |
| 123 | GM1 (d18:1/20:1) | 1570.9 / 290.1 | 1406                                        | 7993                                         | <b>568%</b>               |
| 124 | GM1 (d18:1/20:2) | 1568.9 / 290.1 | 0                                           | 3146                                         | <b>N.A.</b>               |
| 125 | GM1 (d18:1/20:3) | 1566.9 / 290.1 | 0                                           | 1923                                         | <b>N.A.</b>               |
| 126 | GM1 (d18:1/20:4) | 1564.8 / 290.1 | 0                                           | 721                                          | <b>N.A.</b>               |
| 127 | GM1 (d18:1/20:5) | 1562.8 / 290.1 | 0                                           | 721                                          | <b>N.A.</b>               |
| 128 | GM1 (d18:1/22:0) | 1600.9 / 290.1 | 0                                           | 12496                                        | <b>N.A.</b>               |
| 129 | GM1 (d18:1/22:1) | 1598.9 / 290.1 | 0                                           | 4085                                         | <b>N.A.</b>               |
| 130 | GM1 (d18:1/22:2) | 1596.9 / 290.1 | 938                                         | 4085                                         | <b>436%</b>               |
| 131 | GM1 (d18:1/22:3) | 1594.9 / 290.1 | 0                                           | 1842                                         | <b>N.A.</b>               |
| 132 | GM1 (d18:1/22:4) | 1592.9 / 290.1 | 0                                           | 721                                          | <b>N.A.</b>               |
| 133 | GM1 (d18:1/22:5) | 1590.9 / 290.1 | 0                                           | 491                                          | <b>N.A.</b>               |
| 134 | GM1 (d18:1/22:6) | 1588.8 / 290.1 | 0                                           | 721                                          | <b>N.A.</b>               |
| 135 | GM1 (d18:1/24:0) | 1629.0 / 290.1 | 14209                                       | 51796                                        | <b>365%</b>               |
| 136 | GM1 (d18:1/24:1) | 1626.9 / 290.1 | 0                                           | 21736                                        | <b>N.A.</b>               |
| 137 | GM1 (d18:1/26:0) | 1657.0 / 290.1 | 1406                                        | 3124                                         | <b>222%</b>               |
| 138 | GM1 (d18:1/28:0) | 1685.0 / 290.1 | 0                                           | 721                                          | <b>N.A.</b>               |
| 139 | GM1 (d18:1/30:0) | 1713.1 / 290.1 | 0                                           | 1442                                         | <b>N.A.</b>               |

| No. | Components       | Q1/Q3<br>( <i>m/z</i> ) | Cell HK-2<br>(counts/10 <sup>6</sup> cells) | Cell ACHN<br>(counts/10 <sup>6</sup> cells)) | Ratio ACHN to HK-2<br>(%) |
|-----|------------------|-------------------------|---------------------------------------------|----------------------------------------------|---------------------------|
| 140 | GM2 (d18:1/0:0)  | 1116.6 / 290.1          | 2334                                        | 96782                                        | <b>4146%</b>              |
| 141 | GM2 (d18:1/16:0) | 1354.8 / 290.1          | 1017367                                     | 7018688                                      | <b>690%</b>               |
| 142 | GM2 (d18:1/18:0) | 1382.8 / 290.1          | 42670                                       | 687558                                       | <b>1611%</b>              |
| 143 | GM2 (d18:1/18:1) | 1380.8 / 290.1          | 17123                                       | 68758                                        | <b>402%</b>               |
| 144 | GM2 (d18:1/18:2) | 1378.8 / 290.1          | 1411                                        | 7630                                         | <b>541%</b>               |
| 145 | GM2 (d18:1/18:3) | 1376.8 / 290.1          | 4221                                        | 17972                                        | <b>426%</b>               |
| 146 | GM2 (d18:1/20:0) | 1410.8 / 290.1          | 7033                                        | 183937                                       | <b>2615%</b>              |
| 147 | GM2 (d18:1/20:1) | 1408.8 / 290.1          | 0                                           | 37246                                        | <b>N.A.</b>               |
| 148 | GM2 (d18:1/20:2) | 1406.8 / 290.1          | 1406                                        | 5284                                         | <b>376%</b>               |
| 149 | GM2 (d18:1/20:3) | 1404.8 / 290.1          | 0                                           | 3604                                         | <b>N.A.</b>               |
| 150 | GM2 (d18:1/20:4) | 1402.8 / 290.1          | 0                                           | 3593                                         | <b>N.A.</b>               |
| 151 | GM2 (d18:1/20:5) | 1400.8 / 290.1          | 0                                           | 3416                                         | <b>N.A.</b>               |
| 152 | GM2 (d18:1/22:0) | 1438.9 / 290.1          | 22037                                       | 384682                                       | <b>1746%</b>              |
| 153 | GM2 (d18:1/22:1) | 1436.9 / 290.1          | 11722                                       | 125981                                       | <b>1075%</b>              |
| 154 | GM2 (d18:1/22:2) | 1434.8 / 290.1          | 0                                           | 9413                                         | <b>N.A.</b>               |
| 155 | GM2 (d18:1/22:3) | 1432.8 / 290.1          | 0                                           | 1474                                         | <b>N.A.</b>               |
| 156 | GM2 (d18:1/22:4) | 1430.8 / 290.1          | 938                                         | 4351                                         | <b>464%</b>               |
| 157 | GM2 (d18:1/22:5) | 1428.8 / 290.1          | 4220                                        | 13655                                        | <b>324%</b>               |
| 158 | GM2 (d18:1/22:6) | 1426.8 / 290.1          | 0                                           | 13811                                        | <b>N.A.</b>               |
| 159 | GM2 (d18:1/24:0) | 1466.9 / 290.1          | 101289                                      | 1114595                                      | <b>1100%</b>              |



| No. | Components       | Q1/Q3<br>(m/z) | Cell HK-2<br>(counts/10 <sup>6</sup> cells) | Cell ACHN<br>(counts/10 <sup>6</sup> cells)) | Ratio ACHN to HK-2<br>(%) |
|-----|------------------|----------------|---------------------------------------------|----------------------------------------------|---------------------------|
| 160 | GM2 (d18:1/24:1) | 1464.9 / 290.1 | 51576                                       | 319244                                       | <b>619%</b>               |
| 161 | GM2 (d18:1/26:0) | 1494.9 / 290.1 | 1406                                        | 28117                                        | <b>2000%</b>              |
| 162 | GM2 (d18:1/28:0) | 1523.0 / 290.1 | 2344                                        | 1659                                         | <b>71%</b>                |
| 163 | GM2 (d18:1/30:0) | 1551.0 / 290.1 | 4689                                        | 13464                                        | <b>287%</b>               |
| 164 | GM3 (d18:1/0:0)  | 913.5 / 290.1  | 3224                                        | 331646                                       | <b>10286%</b>             |
| 165 | GM3 (d18:1/16:0) | 1151.7 / 290.1 | 12745039                                    | 16748086                                     | <b>131%</b>               |
| 166 | GM3 (d18:1/18:0) | 1179.7 / 290.1 | 716656                                      | 2486179                                      | <b>347%</b>               |
| 167 | GM3 (d18:1/18:1) | 1177.7 / 290.1 | 196011                                      | 514072                                       | <b>262%</b>               |
| 168 | GM3 (d18:1/18:2) | 1175.7 / 290.1 | 1435                                        | 15648                                        | <b>1090%</b>              |
| 169 | GM3 (d18:1/18:3) | 1173.7 / 290.1 | 11815                                       | 8279                                         | <b>70%</b>                |
| 170 | GM3 (d18:1/20:0) | 1207.8 / 290.1 | 122934                                      | 406867                                       | <b>331%</b>               |
| 171 | GM3 (d18:1/20:1) | 1205.8 / 290.1 | 22512                                       | 82907                                        | <b>368%</b>               |
| 172 | GM3 (d18:1/20:2) | 1203.7 / 290.1 | 11718                                       | 19490                                        | <b>166%</b>               |
| 173 | GM3 (d18:1/20:3) | 1201.7 / 290.1 | 938                                         | 4538                                         | <b>484%</b>               |
| 174 | GM3 (d18:1/20:4) | 1199.7 / 290.1 | 2506                                        | 18229                                        | <b>727%</b>               |
| 175 | GM3 (d18:1/20:5) | 1197.7 / 290.1 | 5304                                        | 23597                                        | <b>445%</b>               |
| 176 | GM3 (d18:1/22:0) | 1235.8 / 290.1 | 302041                                      | 966394                                       | <b>320%</b>               |
| 177 | GM3 (d18:1/22:1) | 1233.8 / 290.1 | 74557                                       | 280873                                       | <b>377%</b>               |
| 178 | GM3 (d18:1/22:2) | 1231.8 / 290.1 | 12660                                       | 24958                                        | <b>197%</b>               |
| 179 | GM3 (d18:1/22:3) | 1229.8 / 290.1 | 2832                                        | 10648                                        | <b>376%</b>               |

| No. | Components           | Q1/Q3<br>( <i>m/z</i> ) | Cell HK-2<br>(counts/10 <sup>6</sup> cells) | Cell ACHN<br>(counts/10 <sup>6</sup> cells)) | Ratio ACHN to HK-2<br>(%) |
|-----|----------------------|-------------------------|---------------------------------------------|----------------------------------------------|---------------------------|
| 180 | GM3 (d18:1/22:4)     | 1227.7 / 290.1          | 0                                           | 3063                                         | <b>N.A.</b>               |
| 181 | GM3 (d18:1/22:5)     | 1225.7 / 290.1          | 1789                                        | 10889                                        | <b>609%</b>               |
| 182 | GM3 (d18:1/22:6)     | 1223.7 / 290.1          | 5637                                        | 28727                                        | <b>510%</b>               |
| 183 | GM3 (d18:1/24:0)     | 1263.8 / 290.1          | 735145                                      | 1721588                                      | <b>234%</b>               |
| 184 | GM3 (d18:1/24:1)     | 1261.8 / 290.1          | 370051                                      | 639977                                       | <b>173%</b>               |
| 185 | GM3 (d18:1/26:0)     | 1291.9 / 290.1          | 15004                                       | 64413                                        | <b>429%</b>               |
| 186 | GM3 (d18:1/28:0)     | 1319.9 / 290.1          | 938                                         | 2312                                         | <b>247%</b>               |
| 187 | GM3 (d18:1/30:0)     | 1347.9 / 290.1          | 0                                           | 3407                                         | <b>N.A.</b>               |
| 188 | MSGb5 (d18:1/0:0)    | 719.8 / 290.1           | 47839                                       | 587159                                       | <b>1227%</b>              |
| 189 | MSGb5 (d18:1/16:0) 1 | 838.9 / 290.1           | 6680                                        | 6418501                                      | <b>96078%</b>             |
| 190 | MSGb5 (d18:1/16:0) 2 | 838.9 / 290.1           | 11831866                                    | 32037533                                     | <b>271%</b>               |
| 191 | MSGb5 (d18:1/18:0) 1 | 853.0 / 290.1           | 44554                                       | 27911024                                     | <b>62646%</b>             |
| 192 | MSGb5 (d18:1/18:0) 2 | 853.0 / 290.1           | 831800                                      | 4863876                                      | <b>585%</b>               |
| 193 | MSGb5 (d18:1/18:1) 1 | 851.9 / 290.1           | 16895                                       | 6255382                                      | <b>37025%</b>             |
| 194 | MSGb5 (d18:1/18:1) 2 | 851.9 / 290.1           | 154122                                      | 1549533                                      | <b>1005%</b>              |
| 195 | MSGb5 (d18:1/18:2)   | 850.9 / 290.1           | 39321                                       | 915796                                       | <b>2329%</b>              |
| 196 | MSGb5 (d18:1/18:3)   | 849.9 / 290.1           | 35017                                       | 246373                                       | <b>704%</b>               |
| 197 | MSGb5 (d18:1/20:0) 1 | 867.0 / 290.1           | 40289                                       | 3904110                                      | <b>9690%</b>              |
| 198 | MSGb5 (d18:1/20:0) 2 | 867.0 / 290.1           | 483168                                      | 2099817                                      | <b>435%</b>               |
| 199 | MSGb5 (d18:1/20:1)   | 866.0 / 290.1           | 8901                                        | 1228163                                      | <b>13798%</b>             |

| No. | Components           | Q1/Q3<br>( <i>m/z</i> ) | Cell HK-2<br>(counts/10 <sup>6</sup> cells) | Cell ACHN<br>(counts/10 <sup>6</sup> cells)) | Ratio ACHN to HK-2<br>(%) |
|-----|----------------------|-------------------------|---------------------------------------------|----------------------------------------------|---------------------------|
| 200 | MSGb5 (d18:1/20:2) 1 | 865.0 / 290.1           | 5073                                        | 586395                                       | <b>11559%</b>             |
| 201 | MSGb5 (d18:1/20:2) 2 | 865.0 / 290.1           | 123167                                      | 1416729                                      | <b>1150%</b>              |
| 202 | MSGb5 (d18:1/20:3) 1 | 863.9 / 290.1           | 48776                                       | 1116397                                      | <b>2289%</b>              |
| 203 | MSGb5 (d18:1/20:3) 2 | 863.9 / 290.1           | 83893                                       | 1104251                                      | <b>1316%</b>              |
| 204 | MSGb5 (d18:1/20:4)   | 862.9 / 290.1           | 2726                                        | 626903                                       | <b>23000%</b>             |
| 205 | MSGb5 (d18:1/20:5)   | 861.9 / 290.1           | 1765                                        | 536379                                       | <b>30396%</b>             |
| 206 | MSGb5 (d18:1/22:0) 1 | 881.0 / 290.1           | 172884                                      | 830130                                       | <b>480%</b>               |
| 207 | MSGb5 (d18:1/22:0) 2 | 881.0 / 290.1           | 2045582                                     | 11971671                                     | <b>585%</b>               |
| 208 | MSGb5 (d18:1/22:1) 1 | 880.0 / 290.1           | 546557                                      | 2743441                                      | <b>502%</b>               |
| 209 | MSGb5 (d18:1/22:1) 2 | 880.0 / 290.1           | 90540                                       | 564956                                       | <b>624%</b>               |
| 210 | MSGb5 (d18:1/22:2)   | 879.0 / 290.1           | 161123                                      | 1596421                                      | <b>991%</b>               |
| 211 | MSGb5 (d18:1/22:3) 1 | 878.0 / 290.1           | 356137                                      | 1843731                                      | <b>518%</b>               |
| 212 | MSGb5 (d18:1/22:3) 2 | 878.0 / 290.1           | 110234                                      | 1203334                                      | <b>1092%</b>              |
| 213 | MSGb5 (d18:1/22:4)   | 877.0 / 290.1           | 233745                                      | 1383616                                      | <b>592%</b>               |
| 214 | MSGb5 (d18:1/22:5)   | 875.9 / 290.1           | 45662                                       | 162351                                       | <b>356%</b>               |
| 215 | MSGb5 (d18:1/22:6)   | 874.9 / 290.1           | 36200                                       | 146284                                       | <b>404%</b>               |
| 216 | MSGb5 (d18:1/24:0) 1 | 895.0 / 290.1           | 1778389                                     | 5653999                                      | <b>318%</b>               |
| 217 | MSGb5 (d18:1/24:0) 2 | 895.0 / 290.1           | 5164683                                     | 19827504                                     | <b>384%</b>               |
| 218 | MSGb5 (d18:1/24:1) 1 | 894.0 / 290.1           | 273456                                      | 613257                                       | <b>224%</b>               |
| 219 | MSGb5 (d18:1/24:1) 2 | 894.0 / 290.1           | 4851418                                     | 15395102                                     | <b>317%</b>               |

| No. | Components                 | Q1/Q3<br>( <i>m/z</i> ) | Cell HK-2<br>(counts/10 <sup>6</sup> cells) | Cell ACHN<br>(counts/10 <sup>6</sup> cells)) | Ratio ACHN to HK-2<br>(%) |
|-----|----------------------------|-------------------------|---------------------------------------------|----------------------------------------------|---------------------------|
| 220 | MSGb5 (d18:1/24:1) 3       | 894.0 / 290.1           | 350804                                      | 1282352                                      | <b>366%</b>               |
| 221 | MSGb5 (d18:1/26:0)         | 909.0 / 290.1           | 190239                                      | 935727                                       | <b>492%</b>               |
| 222 | MSGb5 (d18:1/28:0)         | 923.0 / 290.1           | 74505                                       | 270926                                       | <b>364%</b>               |
| 223 | MSGb5 (d18:1/30:0)         | 937.1 / 290.1           | 15209                                       | 141356                                       | <b>929%</b>               |
| 224 | Speculated 1 (d18:1/0:0) 1 | 946.4 / 290.1           | 2139109                                     | 18592528                                     | <b>869%</b>               |
| 225 | Speculated 1 (d18:1/0:0) 2 | 946.4 / 290.1           | 44089                                       | 1131576                                      | <b>2567%</b>              |
| 226 | Speculated 1 (d18:1/16:0)  | 1065.5 / 290.1          | 5046                                        | 76232                                        | <b>1511%</b>              |
| 227 | Speculated 1 (d18:1/18:0)  | 1079.5 / 290.1          | 8766                                        | 12704                                        | <b>145%</b>               |
| 228 | Speculated 1 (d18:1/18:1)  | 1078.5 / 290.1          | 17176                                       | 43652                                        | <b>254%</b>               |
| 229 | Speculated 1 (d18:1/18:2)  | 1077.5 / 290.1          | 28606                                       | 165501                                       | <b>579%</b>               |
| 230 | Speculated 1 (d18:1/18:3)  | 1076.5 / 290.1          | 17945                                       | 83326                                        | <b>464%</b>               |
| 231 | Speculated 1 (d18:1/20:0)  | 1093.5 / 290.1          | 6076                                        | 35521                                        | <b>585%</b>               |
| 232 | Speculated 1 (d18:1/20:1)  | 1092.5 / 290.1          | 18852                                       | 296286                                       | <b>1572%</b>              |
| 233 | Speculated 1 (d18:1/20:2)  | 1091.5 / 290.1          | 37902                                       | 1148574                                      | <b>3030%</b>              |
| 234 | Speculated 1 (d18:1/20:3)  | 1090.5 / 290.1          | 33544                                       | 587144                                       | <b>1750%</b>              |
| 235 | Speculated 1 (d18:1/20:4)  | 1089.5 / 290.1          | 11030                                       | 92121                                        | <b>835%</b>               |
| 236 | Speculated 1 (d18:1/20:5)  | 1088.5 / 290.1          | 9796                                        | 19863                                        | <b>203%</b>               |
| 237 | Speculated 1 (d18:1/22:0)  | 1107.6 / 290.1          | 1502                                        | 37710                                        | <b>2510%</b>              |
| 238 | Speculated 1 (d18:1/22:1)  | 1106.6 / 290.1          | 12049                                       | 413985                                       | <b>3436%</b>              |
| 239 | Speculated 1 (d18:1/22:2)  | 1105.5 / 290.1          | 31710                                       | 2051850                                      | <b>6471%</b>              |

| No. | Components                  | Q1/Q3<br>( <i>m/z</i> ) | Cell HK-2<br>(counts/10 <sup>6</sup> cells) | Cell ACHN<br>(counts/10 <sup>6</sup> cells)) | Ratio ACHN to HK-2<br>(%) |
|-----|-----------------------------|-------------------------|---------------------------------------------|----------------------------------------------|---------------------------|
| 240 | Speculated 1 (d18:1/22:3) 1 | 1104.5 / 290.1          | 103860                                      | 2351849                                      | <b>2264%</b>              |
| 241 | Speculated 1 (d18:1/22:3) 2 | 1104.5 / 290.1          | 13488                                       | 920341                                       | <b>6824%</b>              |
| 242 | Speculated 1 (d18:1/22:4)   | 1103.5 / 290.1          | 55980                                       | 1093191                                      | <b>1953%</b>              |
| 243 | Speculated 1 (d18:1/22:5)   | 1102.5 / 290.1          | 15339                                       | 94423                                        | <b>616%</b>               |
| 244 | Speculated 1 (d18:1/22:6)   | 1101.5 / 290.1          | 4321                                        | 31931                                        | <b>739%</b>               |
| 245 | Speculated 1 (d18:1/24:0)   | 1121.6 / 290.1          | 9565                                        | 44143                                        | <b>462%</b>               |
| 246 | Speculated 1 (d18:1/24:1)   | 1120.6 / 290.1          | 954                                         | 24989                                        | <b>2620%</b>              |
| 247 | Speculated 1 (d18:1/26:0)   | 1135.6 / 290.1          | 0                                           | 16646                                        | <b>N.A.</b>               |
| 248 | Speculated 1 (d18:1/28:0)   | 1149.6 / 290.1          | 346349                                      | 1107839                                      | <b>320%</b>               |
| 249 | Speculated 1 (d18:1/30:0)   | 1163.6 / 290.1          | 0                                           | 29210                                        | <b>N.A.</b>               |
| 250 | Speculated 2 (d18:1/0:0) 1  | 966.9 / 290.1           | 360535                                      | 1416874                                      | <b>393%</b>               |
| 251 | Speculated 2 (d18:1/0:0) 2  | 966.9 / 290.1           | 219002                                      | 1632364                                      | <b>745%</b>               |
| 252 | Speculated 2 (d18:1/16:0)   | 1086.0 / 290.1          | 272240                                      | 199296                                       | <b>73%</b>                |
| 253 | Speculated 2 (d18:1/18:0)   | 1100.0 / 290.1          | 10029                                       | 36641                                        | <b>365%</b>               |
| 254 | Speculated 2 (d18:1/18:1)   | 1099.0 / 290.1          | 9606                                        | 82533                                        | <b>859%</b>               |
| 255 | Speculated 2 (d18:1/18:2)   | 1098.0 / 290.1          | 7320                                        | 186518                                       | <b>2548%</b>              |
| 256 | Speculated 2 (d18:1/18:3)   | 1097.0 / 290.1          | 31777                                       | 176329                                       | <b>555%</b>               |
| 257 | Speculated 2 (d18:1/20:0)   | 1114.1 / 290.1          | 5483                                        | 46614                                        | <b>850%</b>               |
| 258 | Speculated 2 (d18:1/20:1)   | 1113.1 / 290.1          | 5490                                        | 242070                                       | <b>4409%</b>              |
| 259 | Speculated 2 (d18:1/20:2)   | 1112.0 / 290.1          | 13878                                       | 595346                                       | <b>4290%</b>              |

| No. | Components                  | Q1/Q3<br>( <i>m/z</i> ) | Cell HK-2<br>(counts/10 <sup>6</sup> cells) | Cell ACHN<br>(counts/10 <sup>6</sup> cells)) | Ratio ACHN to HK-2<br>(%) |
|-----|-----------------------------|-------------------------|---------------------------------------------|----------------------------------------------|---------------------------|
| 260 | Speculated 2 (d18:1/20:3)   | 1111.0 / 290.1          | 6623                                        | 82558                                        | <b>1247%</b>              |
| 261 | Speculated 2 (d18:1/20:4)   | 1110.0 / 290.1          | 2209                                        | 19843                                        | <b>898%</b>               |
| 262 | Speculated 2 (d18:1/20:5)   | 1109.0 / 290.1          | 4911                                        | 29139                                        | <b>593%</b>               |
| 263 | Speculated 2 (d18:1/22:0)   | 1128.1 / 290.1          | 957                                         | 71162                                        | <b>7433%</b>              |
| 264 | Speculated 2 (d18:1/22:1)   | 1127.1 / 290.1          | 1767                                        | 423058                                       | <b>23941%</b>             |
| 265 | Speculated 2 (d18:1/22:2)   | 1126.1 / 290.1          | 3756                                        | 854411                                       | <b>22747%</b>             |
| 266 | Speculated 2 (d18:1/22:3) 1 | 1125.1 / 290.1          | 10602                                       | 685479                                       | <b>6465%</b>              |
| 267 | Speculated 2 (d18:1/22:3) 2 | 1125.1 / 290.1          | 127476                                      | 469542                                       | <b>368%</b>               |
| 268 | Speculated 2 (d18:1/22:4)   | 1124.0 / 290.1          | 476840                                      | 1439654                                      | <b>302%</b>               |
| 269 | Speculated 2 (d18:1/22:5)   | 1123.0 / 290.1          | 310127                                      | 1033985                                      | <b>333%</b>               |
| 270 | Speculated 2 (d18:1/22:6)   | 1122.0 / 290.1          | 12995                                       | 30650                                        | <b>236%</b>               |
| 271 | Speculated 2 (d18:1/24:0)   | 1142.1 / 290.1          | 1784                                        | 69653                                        | <b>3904%</b>              |
| 272 | Speculated 2 (d18:1/24:1)   | 1141.1 / 290.1          | 16466                                       | 126398                                       | <b>768%</b>               |
| 273 | Speculated 2 (d18:1/26:0)   | 1156.1 / 290.1          | 18937                                       | 129495                                       | <b>684%</b>               |
| 274 | Speculated 2 (d18:1/28:0)   | 1170.1 / 290.1          | 100501                                      | 219078                                       | <b>218%</b>               |
| 275 | Speculated 2 (d18:1/30:0)   | 1184.1 / 290.1          | 2313                                        | 12238                                        | <b>529%</b>               |
| 276 | Total                       |                         | 179734772                                   | 845115961                                    | <b>470%</b>               |

N.A., not applicable.

(b) The peak areas and the ratio of GSL peaks in medium of HK-2 cells and ACHN cells.

| No. | Components          | Q1/Q3<br>( <i>m/z</i> ) | Medium HK-2<br>(counts) | Medium ACHN<br>(counts) | Ratio ACHN to HK-2<br>(%) |
|-----|---------------------|-------------------------|-------------------------|-------------------------|---------------------------|
| 1   | CA19-9 (d18:1/0:0)  | 1424.7 / 290.1          | 0                       | 0                       | #DIV/0!                   |
| 2   | CA19-9 (d18:1/16:0) | 1662.9 / 290.1          | 0                       | 0                       | #DIV/0!                   |
| 3   | CA19-9 (d18:1/18:0) | 1690.9 / 290.1          | 0                       | 0                       | #DIV/0!                   |
| 4   | CA19-9 (d18:1/18:1) | 1688.9 / 290.1          | 0                       | 0                       | #DIV/0!                   |
| 5   | CA19-9 (d18:1/18:2) | 1686.9 / 290.1          | 0                       | 0                       | #DIV/0!                   |
| 6   | CA19-9 (d18:1/18:3) | 1684.9 / 290.1          | 0                       | 0                       | #DIV/0!                   |
| 7   | CA19-9 (d18:1/20:0) | 1719.0 / 290.1          | 0                       | 0                       | #DIV/0!                   |
| 8   | CA19-9 (d18:1/20:1) | 1716.9 / 290.1          | 0                       | 0                       | #DIV/0!                   |
| 9   | CA19-9 (d18:1/20:2) | 1714.9 / 290.1          | 0                       | 769                     | #DIV/0!                   |
| 10  | CA19-9 (d18:1/20:3) | 1712.9 / 290.1          | 0                       | 0                       | #DIV/0!                   |
| 11  | CA19-9 (d18:1/20:4) | 1710.9 / 290.1          | 0                       | 0                       | #DIV/0!                   |
| 12  | CA19-9 (d18:1/20:5) | 1708.9 / 290.1          | 0                       | 0                       | #DIV/0!                   |
| 13  | CA19-9 (d18:1/22:0) | 1747.0 / 290.1          | 0                       | 0                       | #DIV/0!                   |
| 14  | CA19-9 (d18:1/22:1) | 1745.0 / 290.1          | 0                       | 0                       | #DIV/0!                   |
| 15  | CA19-9 (d18:1/22:2) | 1743.0 / 290.1          | 0                       | 0                       | #DIV/0!                   |
| 16  | CA19-9 (d18:1/22:3) | 1740.9 / 290.1          | 0                       | 0                       | #DIV/0!                   |
| 17  | CA19-9 (d18:1/22:4) | 1738.9 / 290.1          | 0                       | 0                       | #DIV/0!                   |
| 18  | CA19-9 (d18:1/22:5) | 1736.9 / 290.1          | 0                       | 0                       | #DIV/0!                   |
| 19  | CA19-9 (d18:1/22:6) | 1734.9 / 290.1          | 0                       | 0                       | #DIV/0!                   |
| 20  | CA19-9 (d18:1/24:0) | 1775.0 / 290.1          | 0                       | 0                       | #DIV/0!                   |

| No. | Components          | Q1/Q3<br>( <i>m/z</i> ) | Medium HK-2<br>(counts) | Medium ACHN<br>(counts) | Ratio ACHN to HK-2<br>(%) |
|-----|---------------------|-------------------------|-------------------------|-------------------------|---------------------------|
| 21  | CA19-9 (d18:1/24:1) | 1773.0 / 290.1          | 0                       | 0                       | #DIV/0!                   |
| 22  | CA19-9 (d18:1/26:0) | 1803.1 / 290.1          | 0                       | 0                       | #DIV/0!                   |
| 23  | CA19-9 (d18:1/28:0) | 1831.1 / 290.1          | 0                       | 0                       | #DIV/0!                   |
| 24  | CA19-9 (d18:1/30:0) | 1859.1 / 290.1          | 0                       | 0                       | #DIV/0!                   |
| 25  | DSGb5 (d18:1/0:0) 1 | 865.4 / 290.1           | 3453                    | 2112                    | 61%                       |
| 26  | DSGb5 (d18:1/0:0) 2 | 865.4 / 290.1           | 8423                    | 7072                    | 84%                       |
| 27  | DSGb5 (d18:1/0:0) 3 | 865.4 / 290.1           | 1941                    | 4012                    | 207%                      |
| 28  | DSGb5 (d18:1/16:0)  | 984.5 / 290.1           | 997593                  | 4577916                 | 459%                      |
| 29  | DSGb5 (d18:1/18:0)  | 998.5 / 290.1           | 77100                   | 135718                  | 176%                      |
| 30  | DSGb5 (d18:1/18:1)  | 997.5 / 290.1           | 6648                    | 8447                    | 127%                      |
| 31  | DSGb5 (d18:1/18:2)  | 996.5 / 290.1           | 11824                   | 99546                   | 842%                      |
| 32  | DSGb5 (d18:1/18:3)  | 995.5 / 290.1           | 38128                   | 245233                  | 643%                      |
| 33  | DSGb5 (d18:1/20:0)  | 1012.5 / 290.1          | 5545                    | 20777                   | 375%                      |
| 34  | DSGb5 (d18:1/20:1)  | 1011.5 / 290.1          | 8762                    | 15663                   | 179%                      |
| 35  | DSGb5 (d18:1/20:2)  | 1010.5 / 290.1          | 1880                    | 1102                    | 59%                       |
| 36  | DSGb5 (d18:1/20:3)  | 1009.5 / 290.1          | 3841                    | 7292                    | 190%                      |
| 37  | DSGb5 (d18:1/20:4)  | 1008.5 / 290.1          | 2691                    | 3586                    | 133%                      |
| 38  | DSGb5 (d18:1/20:5)  | 1007.5 / 290.1          | 7484                    | 20674                   | 276%                      |
| 39  | DSGb5 (d18:1/22:0)  | 1026.5 / 290.1          | 15354                   | 55602                   | 362%                      |
| 40  | DSGb5 (d18:1/22:1)  | 1025.5 / 290.1          | 14997                   | 26336                   | 176%                      |



| No. | Components                      | Q1/Q3<br>( <i>m/z</i> ) | Medium HK-2<br>(counts) | Medium ACHN<br>(counts) | Ratio ACHN to HK-2<br>(%) |
|-----|---------------------------------|-------------------------|-------------------------|-------------------------|---------------------------|
| 41  | DSGb5 (d18:1/22:2)              | 1024.5 / 290.1          | 1158                    | 12032                   | 1039%                     |
| 42  | DSGb5 (d18:1/22:3)              | 1023.5 / 290.1          | 5373                    | 3463                    | 64%                       |
| 43  | DSGb5 (d18:1/22:4)              | 1022.5 / 290.1          | 900                     | 1893                    | 210%                      |
| 44  | DSGb5 (d18:1/22:5)              | 1021.5 / 290.1          | 0                       | 1841                    | #DIV/0!                   |
| 45  | DSGb5 (d18:1/22:6)              | 1020.5 / 290.1          | 1396                    | 3845                    | 275%                      |
| 46  | DSGb5 (d18:1/24:0) 1            | 1040.6 / 290.1          | 31937                   | 45330                   | 142%                      |
| 47  | DSGb5 (d18:1/24:0) 2            | 1040.6 / 290.1          | 13829                   | 25295                   | 183%                      |
| 48  | DSGb5 (d18:1/24:1) 1            | 1039.5 / 290.1          | 7249                    | 21149                   | 292%                      |
| 49  | DSGb5 (d18:1/24:1) 2            | 1039.5 / 290.1          | 69641                   | 105932                  | 152%                      |
| 50  | DSGb5 (d18:1/26:0) 1            | 1054.6 / 290.1          | 844                     | 2604                    | 309%                      |
| 51  | DSGb5 (d18:1/26:0) 2            | 1054.6 / 290.1          | 0                       | 0                       | #DIV/0!                   |
| 52  | DSGb5 (d18:1/28:0)              | 1068.6 / 290.1          | 0                       | 2331                    | #DIV/0!                   |
| 53  | DSGb5 (d18:1/30:0)              | 1082.6 / 290.1          | 3453                    | 0                       | 0%                        |
| 54  | GalNAcDSLc4, RM2 (d18:1/0:0)    | 885.9 / 290.1           | 0                       | 1854                    | #DIV/0!                   |
| 55  | GalNAcDSLc4, RM2 (d18:1/16:0)   | 1005.0 / 290.1          | 102894                  | 101828                  | 99%                       |
| 56  | GalNAcDSLc4, RM2 (d18:1/18:0)   | 1019.0 / 290.1          | 1762                    | 1538                    | 87%                       |
| 57  | GalNAcDSLc4, RM2 (d18:1/18:1)   | 1018.0 / 290.1          | 3075                    | 1496                    | 49%                       |
| 58  | GalNAcDSLc4, RM2 (d18:1/18:2)   | 1017.0 / 290.1          | 1918                    | 1152                    | 60%                       |
| 59  | GalNAcDSLc4, RM2 (d18:1/18:3)   | 1016.0 / 290.1          | 766                     | 0                       | 0%                        |
| 60  | GalNAcDSLc4, RM2 (d18:1/20:0) 1 | 1033.0 / 290.1          | 7027                    | 11165                   | 159%                      |

| No. | Components                      | Q1/Q3<br>( <i>m/z</i> ) | Medium HK-2<br>(counts) | Medium ACHN<br>(counts) | Ratio ACHN to HK-2<br>(%) |
|-----|---------------------------------|-------------------------|-------------------------|-------------------------|---------------------------|
| 61  | GalNAcDSLc4, RM2 (d18:1/20:0) 2 | 1033.0 / 290.1          | 1536                    | 5028                    | 327%                      |
| 62  | GalNAcDSLc4, RM2 (d18:1/20:1)   | 1032.0 / 290.1          | 5805                    | 8399                    | 145%                      |
| 63  | GalNAcDSLc4, RM2 (d18:1/20:2)   | 1031.0 / 290.1          | 2350                    | 0                       | 0%                        |
| 64  | GalNAcDSLc4, RM2 (d18:1/20:3)   | 1030.0 / 290.1          | 0                       | 0                       | #DIV/0!                   |
| 65  | GalNAcDSLc4, RM2 (d18:1/20:4)   | 1029.0 / 290.1          | 0                       | 1169                    | #DIV/0!                   |
| 66  | GalNAcDSLc4, RM2 (d18:1/20:5)   | 1028.0 / 290.1          | 4633                    | 8015                    | 173%                      |
| 67  | GalNAcDSLc4, RM2 (d18:1/22:0) 1 | 1047.0 / 290.1          | 8974                    | 9205                    | 103%                      |
| 68  | GalNAcDSLc4, RM2 (d18:1/22:0) 2 | 1047.0 / 290.1          | 0                       | 0                       | #DIV/0!                   |
| 69  | GalNAcDSLc4, RM2 (d18:1/22:1)   | 1046.0 / 290.1          | 2739                    | 0                       | 0%                        |
| 70  | GalNAcDSLc4, RM2 (d18:1/22:2)   | 1045.0 / 290.1          | 0                       | 3179                    | #DIV/0!                   |
| 71  | GalNAcDSLc4, RM2 (d18:1/22:3)   | 1044.0 / 290.1          | 1146                    | 2297                    | 200%                      |
| 72  | GalNAcDSLc4, RM2 (d18:1/22:4)   | 1043.0 / 290.1          | 1921                    | 0                       | 0%                        |
| 73  | GalNAcDSLc4, RM2 (d18:1/22:5) 1 | 1042.0 / 290.1          | 3097                    | 2628                    | 85%                       |
| 74  | GalNAcDSLc4, RM2 (d18:1/22:5) 2 | 1042.0 / 290.1          | 767                     | 3510                    | 458%                      |
| 75  | GalNAcDSLc4, RM2 (d18:1/22:6) 1 | 1041.0 / 290.1          | 18138                   | 15055                   | 83%                       |
| 76  | GalNAcDSLc4, RM2 (d18:1/22:6) 2 | 1041.0 / 290.1          | 17685                   | 26047                   | 147%                      |
| 77  | GalNAcDSLc4, RM2 (d18:1/24:0)   | 1061.1 / 290.1          | 3460                    | 1153                    | 33%                       |
| 78  | GalNAcDSLc4, RM2 (d18:1/24:1)   | 1060.1 / 290.1          | 24609                   | 16633                   | 68%                       |
| 79  | GalNAcDSLc4, RM2 (d18:1/26:0)   | 1075.1 / 290.1          | 0                       | 1581                    | #DIV/0!                   |
| 80  | GalNAcDSLc4, RM2 (d18:1/28:0)   | 1089.1 / 290.1          | 13498                   | 7862                    | 58%                       |

| No. | Components                    | Q1/Q3<br>( <i>m/z</i> ) | Medium HK-2<br>(counts) | Medium ACHN<br>(counts) | Ratio ACHN to HK-2<br>(%) |
|-----|-------------------------------|-------------------------|-------------------------|-------------------------|---------------------------|
| 81  | GalNAcDSLc4, RM2 (d18:1/30:0) | 1103.1 / 290.1          | 109021                  | 76312                   | 70%                       |
| 82  | GD1a (d18:1/0:0)              | 784.3 / 290.1           | 0                       | 0                       | #DIV/0!                   |
| 83  | GD1a (d18:1/16:0)             | 903.5 / 290.1           | 6356833                 | 7462803                 | 117%                      |
| 84  | GD1a (d18:1/18:0)             | 917.5 / 290.1           | 4503695                 | 4343382                 | 96%                       |
| 85  | GD1a (d18:1/18:1) 1           | 916.5 / 290.1           | 980157                  | 908599                  | 93%                       |
| 86  | GD1a (d18:1/18:1) 2           | 916.5 / 290.1           | 345542                  | 303590                  | 88%                       |
| 87  | GD1a (d18:1/18:1) 3           | 916.5 / 290.1           | 7368                    | 6287                    | 85%                       |
| 88  | GD1a (d18:1/18:2) 1           | 915.5 / 290.1           | 113897                  | 107076                  | 94%                       |
| 89  | GD1a (d18:1/18:2) 2           | 915.5 / 290.1           | 29779                   | 17256                   | 58%                       |
| 90  | GD1a (d18:1/18:3)             | 914.5 / 290.1           | 326274                  | 339623                  | 104%                      |
| 91  | GD1a (d18:1/20:0)             | 931.5 / 290.1           | 435727                  | 353959                  | 81%                       |
| 92  | GD1a (d18:1/20:1)             | 930.5 / 290.1           | 200184                  | 161923                  | 81%                       |
| 93  | GD1a (d18:1/20:2)             | 929.5 / 290.1           | 105557                  | 89529                   | 85%                       |
| 94  | GD1a (d18:1/20:3)             | 928.5 / 290.1           | 242421                  | 243979                  | 101%                      |
| 95  | GD1a (d18:1/20:4)             | 927.5 / 290.1           | 10876                   | 15471                   | 142%                      |
| 96  | GD1a (d18:1/20:5)             | 926.5 / 290.1           | 24006                   | 20186                   | 84%                       |
| 97  | GD1a (d18:1/22:0) 1           | 945.5 / 290.1           | 100730                  | 47248                   | 47%                       |
| 98  | GD1a (d18:1/22:0) 2           | 945.5 / 290.1           | 755516                  | 527555                  | 70%                       |
| 99  | GD1a (d18:1/22:1) 1           | 944.5 / 290.1           | 1533                    | 52632                   | 3433%                     |
| 100 | GD1a (d18:1/22:1) 2           | 944.5 / 290.1           | 252431                  | 210954                  | 84%                       |

| No. | Components          | Q1/Q3<br>( <i>m/z</i> ) | Medium HK-2<br>(counts) | Medium ACHN<br>(counts) | Ratio ACHN to HK-2<br>(%) |
|-----|---------------------|-------------------------|-------------------------|-------------------------|---------------------------|
| 101 | GD1a (d18:1/22:1) 3 | 944.5 / 290.1           | 27305                   | 26315                   | 96%                       |
| 102 | GD1a (d18:1/22:2)   | 943.5 / 290.1           | 1921                    | 107521                  | 5597%                     |
| 103 | GD1a (d18:1/22:3)   | 942.5 / 290.1           | 38029                   | 45746                   | 120%                      |
| 104 | GD1a (d18:1/22:4)   | 941.5 / 290.1           | 372966                  | 387006                  | 104%                      |
| 105 | GD1a (d18:1/22:5)   | 940.5 / 290.1           | 46955                   | 44736                   | 95%                       |
| 106 | GD1a (d18:1/22:6)   | 939.5 / 290.1           | 103889                  | 103849                  | 100%                      |
| 107 | GD1a (d18:1/24:0) 1 | 959.5 / 290.1           | 409893                  | 322843                  | 79%                       |
| 108 | GD1a (d18:1/24:0) 2 | 959.5 / 290.1           | 278215                  | 186395                  | 67%                       |
| 109 | GD1a (d18:1/24:1) 1 | 958.5 / 290.1           | 105079                  | 67524                   | 64%                       |
| 110 | GD1a (d18:1/24:1) 2 | 958.5 / 290.1           | 1089524                 | 696064                  | 64%                       |
| 111 | GD1a (d18:1/24:1) 3 | 958.5 / 290.1           | 14401                   | 9265                    | 64%                       |
| 112 | GD1a (d18:1/26:0) 1 | 973.5 / 290.1           | 4066                    | 2260                    | 56%                       |
| 113 | GD1a (d18:1/26:0) 2 | 973.5 / 290.1           | 2305                    | 1993                    | 86%                       |
| 114 | GD1a (d18:1/28:0)   | 987.6 / 290.1           | 6150                    | 25197                   | 410%                      |
| 115 | GD1a (d18:1/30:0)   | 1001.6 / 290.1          | 0                       | 0                       | #DIV/0!                   |
| 116 | GM1 (d18:1/0:0)     | 1278.6 / 290.1          | 717                     | 0                       | 0%                        |
| 117 | GM1 (d18:1/16:0)    | 1516.8 / 290.1          | 18070                   | 13072                   | 72%                       |
| 118 | GM1 (d18:1/18:0)    | 1544.9 / 290.1          | 1922                    | 6921                    | 360%                      |
| 119 | GM1 (d18:1/18:1)    | 1542.9 / 290.1          | 3448                    | 1170                    | 34%                       |
| 120 | GM1 (d18:1/18:2)    | 1540.8 / 290.1          | 2691                    | 1153                    | 43%                       |

| No. | Components       | Q1/Q3<br>( <i>m/z</i> ) | Medium HK-2<br>(counts) | Medium ACHN<br>(counts) | Ratio ACHN to HK-2<br>(%) |
|-----|------------------|-------------------------|-------------------------|-------------------------|---------------------------|
| 121 | GM1 (d18:1/18:3) | 1538.8 / 290.1          | 4614                    | 1153                    | 25%                       |
| 122 | GM1 (d18:1/20:0) | 1572.9 / 290.1          | 0                       | 0                       | #DIV/0!                   |
| 123 | GM1 (d18:1/20:1) | 1570.9 / 290.1          | 0                       | 0                       | #DIV/0!                   |
| 124 | GM1 (d18:1/20:2) | 1568.9 / 290.1          | 0                       | 1153                    | #DIV/0!                   |
| 125 | GM1 (d18:1/20:3) | 1566.9 / 290.1          | 0                       | 1153                    | #DIV/0!                   |
| 126 | GM1 (d18:1/20:4) | 1564.8 / 290.1          | 0                       | 0                       | #DIV/0!                   |
| 127 | GM1 (d18:1/20:5) | 1562.8 / 290.1          | 769                     | 0                       | 0%                        |
| 128 | GM1 (d18:1/22:0) | 1600.9 / 290.1          | 0                       | 0                       | #DIV/0!                   |
| 129 | GM1 (d18:1/22:1) | 1598.9 / 290.1          | 0                       | 0                       | #DIV/0!                   |
| 130 | GM1 (d18:1/22:2) | 1596.9 / 290.1          | 0                       | 0                       | #DIV/0!                   |
| 131 | GM1 (d18:1/22:3) | 1594.9 / 290.1          | 0                       | 0                       | #DIV/0!                   |
| 132 | GM1 (d18:1/22:4) | 1592.9 / 290.1          | 769                     | 0                       | 0%                        |
| 133 | GM1 (d18:1/22:5) | 1590.9 / 290.1          | 0                       | 0                       | #DIV/0!                   |
| 134 | GM1 (d18:1/22:6) | 1588.8 / 290.1          | 0                       | 0                       | #DIV/0!                   |
| 135 | GM1 (d18:1/24:0) | 1629.0 / 290.1          | 1922                    | 1933                    | 101%                      |
| 136 | GM1 (d18:1/24:1) | 1626.9 / 290.1          | 0                       | 0                       | #DIV/0!                   |
| 137 | GM1 (d18:1/26:0) | 1657.0 / 290.1          | 0                       | 0                       | #DIV/0!                   |
| 138 | GM1 (d18:1/28:0) | 1685.0 / 290.1          | 0                       | 0                       | #DIV/0!                   |
| 139 | GM1 (d18:1/30:0) | 1713.1 / 290.1          | 0                       | 0                       | #DIV/0!                   |
| 140 | GM2 (d18:1/0:0)  | 1116.6 / 290.1          | 3844                    | 1403                    | 36%                       |

| No. | Components       | Q1/Q3<br>( <i>m/z</i> ) | Medium HK-2<br>(counts) | Medium ACHN<br>(counts) | Ratio ACHN to HK-2<br>(%) |
|-----|------------------|-------------------------|-------------------------|-------------------------|---------------------------|
| 141 | GM2 (d18:1/16:0) | 1354.8 / 290.1          | 21530                   | 53059                   | 246%                      |
| 142 | GM2 (d18:1/18:0) | 1382.8 / 290.1          | 6536                    | 5767                    | 88%                       |
| 143 | GM2 (d18:1/18:1) | 1380.8 / 290.1          | 769                     | 0                       | 0%                        |
| 144 | GM2 (d18:1/18:2) | 1378.8 / 290.1          | 0                       | 0                       | #DIV/0!                   |
| 145 | GM2 (d18:1/18:3) | 1376.8 / 290.1          | 0                       | 0                       | #DIV/0!                   |
| 146 | GM2 (d18:1/20:0) | 1410.8 / 290.1          | 0                       | 0                       | #DIV/0!                   |
| 147 | GM2 (d18:1/20:1) | 1408.8 / 290.1          | 0                       | 0                       | #DIV/0!                   |
| 148 | GM2 (d18:1/20:2) | 1406.8 / 290.1          | 0                       | 0                       | #DIV/0!                   |
| 149 | GM2 (d18:1/20:3) | 1404.8 / 290.1          | 0                       | 0                       | #DIV/0!                   |
| 150 | GM2 (d18:1/20:4) | 1402.8 / 290.1          | 0                       | 0                       | #DIV/0!                   |
| 151 | GM2 (d18:1/20:5) | 1400.8 / 290.1          | 1158                    | 769                     | 66%                       |
| 152 | GM2 (d18:1/22:0) | 1438.9 / 290.1          | 0                       | 2307                    | #DIV/0!                   |
| 153 | GM2 (d18:1/22:1) | 1436.9 / 290.1          | 0                       | 0                       | #DIV/0!                   |
| 154 | GM2 (d18:1/22:2) | 1434.8 / 290.1          | 0                       | 1153                    | #DIV/0!                   |
| 155 | GM2 (d18:1/22:3) | 1432.8 / 290.1          | 0                       | 0                       | #DIV/0!                   |
| 156 | GM2 (d18:1/22:4) | 1430.8 / 290.1          | 7715                    | 6548                    | 85%                       |
| 157 | GM2 (d18:1/22:5) | 1428.8 / 290.1          | 21530                   | 10767                   | 50%                       |
| 158 | GM2 (d18:1/22:6) | 1426.8 / 290.1          | 769                     | 0                       | 0%                        |
| 159 | GM2 (d18:1/24:0) | 1466.9 / 290.1          | 3460                    | 4229                    | 122%                      |
| 160 | GM2 (d18:1/24:1) | 1464.9 / 290.1          | 769                     | 769                     | 100%                      |

| No. | Components       | Q1/Q3<br>( <i>m/z</i> ) | Medium HK-2<br>(counts) | Medium ACHN<br>(counts) | Ratio ACHN to HK-2<br>(%) |
|-----|------------------|-------------------------|-------------------------|-------------------------|---------------------------|
| 161 | GM2 (d18:1/26:0) | 1494.9 / 290.1          | 0                       | 0                       | #DIV/0!                   |
| 162 | GM2 (d18:1/28:0) | 1523.0 / 290.1          | 0                       | 0                       | #DIV/0!                   |
| 163 | GM2 (d18:1/30:0) | 1551.0 / 290.1          | 4231                    | 1922                    | 45%                       |
| 164 | GM3 (d18:1/0:0)  | 913.5 / 290.1           | 4927                    | 1462                    | 30%                       |
| 165 | GM3 (d18:1/16:0) | 1151.7 / 290.1          | 6482229                 | 5807321                 | 90%                       |
| 166 | GM3 (d18:1/18:0) | 1179.7 / 290.1          | 2156192                 | 1774185                 | 82%                       |
| 167 | GM3 (d18:1/18:1) | 1177.7 / 290.1          | 687319                  | 542265                  | 79%                       |
| 168 | GM3 (d18:1/18:2) | 1175.7 / 290.1          | 8060                    | 0                       | 0%                        |
| 169 | GM3 (d18:1/18:3) | 1173.7 / 290.1          | 7597                    | 8458                    | 111%                      |
| 170 | GM3 (d18:1/20:0) | 1207.8 / 290.1          | 144974                  | 89604                   | 62%                       |
| 171 | GM3 (d18:1/20:1) | 1205.8 / 290.1          | 68052                   | 37698                   | 55%                       |
| 172 | GM3 (d18:1/20:2) | 1203.7 / 290.1          | 59209                   | 52619                   | 89%                       |
| 173 | GM3 (d18:1/20:3) | 1201.7 / 290.1          | 752                     | 750                     | 100%                      |
| 174 | GM3 (d18:1/20:4) | 1199.7 / 290.1          | 3075                    | 2690                    | 87%                       |
| 175 | GM3 (d18:1/20:5) | 1197.7 / 290.1          | 28225                   | 12759                   | 45%                       |
| 176 | GM3 (d18:1/22:0) | 1235.8 / 290.1          | 252478                  | 142274                  | 56%                       |
| 177 | GM3 (d18:1/22:1) | 1233.8 / 290.1          | 121510                  | 56243                   | 46%                       |
| 178 | GM3 (d18:1/22:2) | 1231.8 / 290.1          | 18479                   | 11919                   | 65%                       |
| 179 | GM3 (d18:1/22:3) | 1229.8 / 290.1          | 1537                    | 0                       | 0%                        |
| 180 | GM3 (d18:1/22:4) | 1227.7 / 290.1          | 0                       | 0                       | #DIV/0!                   |

| No. | Components           | Q1/Q3<br>( <i>m/z</i> ) | Medium HK-2<br>(counts) | Medium ACHN<br>(counts) | Ratio ACHN to HK-2<br>(%) |
|-----|----------------------|-------------------------|-------------------------|-------------------------|---------------------------|
| 181 | GM3 (d18:1/22:5)     | 1225.7 / 290.1          | 8021                    | 7546                    | 94%                       |
| 182 | GM3 (d18:1/22:6)     | 1223.7 / 290.1          | 45318                   | 25288                   | 56%                       |
| 183 | GM3 (d18:1/24:0)     | 1263.8 / 290.1          | 595214                  | 273110                  | 46%                       |
| 184 | GM3 (d18:1/24:1)     | 1261.8 / 290.1          | 232662                  | 96523                   | 41%                       |
| 185 | GM3 (d18:1/26:0)     | 1291.9 / 290.1          | 3845                    | 3460                    | 90%                       |
| 186 | GM3 (d18:1/28:0)     | 1319.9 / 290.1          | 769                     | 0                       | 0%                        |
| 187 | GM3 (d18:1/30:0)     | 1347.9 / 290.1          | 0                       | 769                     | #DIV/0!                   |
| 188 | MSGb5 (d18:1/0:0)    | 719.8 / 290.1           | 3319                    | 11150                   | 336%                      |
| 189 | MSGb5 (d18:1/16:0) 1 | 838.9 / 290.1           | 3012                    | 14473                   | 481%                      |
| 190 | MSGb5 (d18:1/16:0) 2 | 838.9 / 290.1           | 539356                  | 1379809                 | 256%                      |
| 191 | MSGb5 (d18:1/18:0) 1 | 853.0 / 290.1           | 4596                    | 79439                   | 1728%                     |
| 192 | MSGb5 (d18:1/18:0) 2 | 853.0 / 290.1           | 45099                   | 65391                   | 145%                      |
| 193 | MSGb5 (d18:1/18:1) 1 | 851.9 / 290.1           | 16477                   | 18545                   | 113%                      |
| 194 | MSGb5 (d18:1/18:1) 2 | 851.9 / 290.1           | 16477                   | 20710                   | 126%                      |
| 195 | MSGb5 (d18:1/18:2)   | 850.9 / 290.1           | 7304                    | 13916                   | 191%                      |
| 196 | MSGb5 (d18:1/18:3)   | 849.9 / 290.1           | 4523                    | 1072                    | 24%                       |
| 197 | MSGb5 (d18:1/20:0) 1 | 867.0 / 290.1           | 2340                    | 4942                    | 211%                      |
| 198 | MSGb5 (d18:1/20:0) 2 | 867.0 / 290.1           | 8043                    | 9254                    | 115%                      |
| 199 | MSGb5 (d18:1/20:1)   | 866.0 / 290.1           | 767                     | 1061                    | 138%                      |
| 200 | MSGb5 (d18:1/20:2) 1 | 865.0 / 290.1           | 0                       | 3911                    | #DIV/0!                   |



| No. | Components           | Q1/Q3<br>( <i>m/z</i> ) | Medium HK-2<br>(counts) | Medium ACHN<br>(counts) | Ratio ACHN to HK-2<br>(%) |
|-----|----------------------|-------------------------|-------------------------|-------------------------|---------------------------|
| 201 | MSGb5 (d18:1/20:2) 2 | 865.0 / 290.1           | 9227                    | 6114                    | 66%                       |
| 202 | MSGb5 (d18:1/20:3) 1 | 863.9 / 290.1           | 3755                    | 11448                   | 305%                      |
| 203 | MSGb5 (d18:1/20:3) 2 | 863.9 / 290.1           | 13443                   | 10449                   | 78%                       |
| 204 | MSGb5 (d18:1/20:4)   | 862.9 / 290.1           | 2293                    | 8648                    | 377%                      |
| 205 | MSGb5 (d18:1/20:5)   | 861.9 / 290.1           | 1426                    | 1171                    | 82%                       |
| 206 | MSGb5 (d18:1/22:0) 1 | 881.0 / 290.1           | 1982                    | 3118                    | 157%                      |
| 207 | MSGb5 (d18:1/22:0) 2 | 881.0 / 290.1           | 22839                   | 32296                   | 141%                      |
| 208 | MSGb5 (d18:1/22:1) 1 | 880.0 / 290.1           | 8715                    | 12298                   | 141%                      |
| 209 | MSGb5 (d18:1/22:1) 2 | 880.0 / 290.1           | 1918                    | 1538                    | 80%                       |
| 210 | MSGb5 (d18:1/22:2)   | 879.0 / 290.1           | 4736                    | 4526                    | 96%                       |
| 211 | MSGb5 (d18:1/22:3) 1 | 878.0 / 290.1           | 13393                   | 8894                    | 66%                       |
| 212 | MSGb5 (d18:1/22:3) 2 | 878.0 / 290.1           | 744                     | 2252                    | 303%                      |
| 213 | MSGb5 (d18:1/22:4)   | 877.0 / 290.1           | 3106                    | 6557                    | 211%                      |
| 214 | MSGb5 (d18:1/22:5)   | 875.9 / 290.1           | 759                     | 1317                    | 174%                      |
| 215 | MSGb5 (d18:1/22:6)   | 874.9 / 290.1           | 0                       | 4225                    | #DIV/0!                   |
| 216 | MSGb5 (d18:1/24:0) 1 | 895.0 / 290.1           | 16116                   | 17922                   | 111%                      |
| 217 | MSGb5 (d18:1/24:0) 2 | 895.0 / 290.1           | 41131                   | 58437                   | 142%                      |
| 218 | MSGb5 (d18:1/24:1) 1 | 894.0 / 290.1           | 1123                    | 3228                    | 287%                      |
| 219 | MSGb5 (d18:1/24:1) 2 | 894.0 / 290.1           | 58917                   | 56135                   | 95%                       |
| 220 | MSGb5 (d18:1/24:1) 3 | 894.0 / 290.1           | 2304                    | 1923                    | 83%                       |

| No. | Components                  | Q1/Q3<br>( <i>m/z</i> ) | Medium HK-2<br>(counts) | Medium ACHN<br>(counts) | Ratio ACHN to HK-2<br>(%) |
|-----|-----------------------------|-------------------------|-------------------------|-------------------------|---------------------------|
| 221 | MSGb5 (d18:1/26:0)          | 909.0 / 290.1           | 0                       | 5915                    | #DIV/0!                   |
| 222 | MSGb5 (d18:1/28:0)          | 923.0 / 290.1           | 67320                   | 64147                   | 95%                       |
| 223 | MSGb5 (d18:1/30:0)          | 937.1 / 290.1           | 13386                   | 13134                   | 98%                       |
| 224 | Speculated 1 (d18:1/0:0) 1  | 946.4 / 290.1           | 438591                  | 333248                  | 76%                       |
| 225 | Speculated 1 (d18:1/0:0) 2  | 946.4 / 290.1           | 33455                   | 28267                   | 84%                       |
| 226 | Speculated 1 (d18:1/16:0)   | 1065.5 / 290.1          | 0                       | 0                       | #DIV/0!                   |
| 227 | Speculated 1 (d18:1/18:0)   | 1079.5 / 290.1          | 5690                    | 5766                    | 101%                      |
| 228 | Speculated 1 (d18:1/18:1)   | 1078.5 / 290.1          | 36236                   | 26488                   | 73%                       |
| 229 | Speculated 1 (d18:1/18:2)   | 1077.5 / 290.1          | 104499                  | 147962                  | 142%                      |
| 230 | Speculated 1 (d18:1/18:3)   | 1076.5 / 290.1          | 74024                   | 70640                   | 95%                       |
| 231 | Speculated 1 (d18:1/20:0)   | 1093.5 / 290.1          | 3707                    | 3710                    | 100%                      |
| 232 | Speculated 1 (d18:1/20:1)   | 1092.5 / 290.1          | 41831                   | 26670                   | 64%                       |
| 233 | Speculated 1 (d18:1/20:2)   | 1091.5 / 290.1          | 206421                  | 159071                  | 77%                       |
| 234 | Speculated 1 (d18:1/20:3)   | 1090.5 / 290.1          | 106791                  | 74478                   | 70%                       |
| 235 | Speculated 1 (d18:1/20:4)   | 1089.5 / 290.1          | 38061                   | 29185                   | 77%                       |
| 236 | Speculated 1 (d18:1/20:5)   | 1088.5 / 290.1          | 10669                   | 12599                   | 118%                      |
| 237 | Speculated 1 (d18:1/22:0)   | 1107.6 / 290.1          | 2671                    | 1907                    | 71%                       |
| 238 | Speculated 1 (d18:1/22:1)   | 1106.6 / 290.1          | 15721                   | 7612                    | 48%                       |
| 239 | Speculated 1 (d18:1/22:2)   | 1105.5 / 290.1          | 68711                   | 55224                   | 80%                       |
| 240 | Speculated 1 (d18:1/22:3) 1 | 1104.5 / 290.1          | 363038                  | 269914                  | 74%                       |

| No. | Components                  | Q1/Q3<br>( <i>m/z</i> ) | Medium HK-2<br>(counts) | Medium ACHN<br>(counts) | Ratio ACHN to HK-2<br>(%) |
|-----|-----------------------------|-------------------------|-------------------------|-------------------------|---------------------------|
| 241 | Speculated 1 (d18:1/22:3) 2 | 1104.5 / 290.1          | 40731                   | 32084                   | 79%                       |
| 242 | Speculated 1 (d18:1/22:4)   | 1103.5 / 290.1          | 183867                  | 132069                  | 72%                       |
| 243 | Speculated 1 (d18:1/22:5)   | 1102.5 / 290.1          | 43651                   | 27574                   | 63%                       |
| 244 | Speculated 1 (d18:1/22:6)   | 1101.5 / 290.1          | 6108                    | 7191                    | 118%                      |
| 245 | Speculated 1 (d18:1/24:0)   | 1121.6 / 290.1          | 15660                   | 19960                   | 127%                      |
| 246 | Speculated 1 (d18:1/24:1)   | 1120.6 / 290.1          | 0                       | 1927                    | #DIV/0!                   |
| 247 | Speculated 1 (d18:1/26:0)   | 1135.6 / 290.1          | 777                     | 1137                    | 146%                      |
| 248 | Speculated 1 (d18:1/28:0)   | 1149.6 / 290.1          | 430305                  | 378901                  | 88%                       |
| 249 | Speculated 1 (d18:1/30:0)   | 1163.6 / 290.1          | 1152                    | 7443                    | 646%                      |
| 250 | Speculated 2 (d18:1/0:0) 1  | 966.9 / 290.1           | 104210                  | 66721                   | 64%                       |
| 251 | Speculated 2 (d18:1/0:0) 2  | 966.9 / 290.1           | 7956                    | 15874                   | 200%                      |
| 252 | Speculated 2 (d18:1/16:0)   | 1086.0 / 290.1          | 39957                   | 44680                   | 112%                      |
| 253 | Speculated 2 (d18:1/18:0)   | 1100.0 / 290.1          | 19941                   | 10657                   | 53%                       |
| 254 | Speculated 2 (d18:1/18:1)   | 1099.0 / 290.1          | 45273                   | 22103                   | 49%                       |
| 255 | Speculated 2 (d18:1/18:2)   | 1098.0 / 290.1          | 28004                   | 16338                   | 58%                       |
| 256 | Speculated 2 (d18:1/18:3)   | 1097.0 / 290.1          | 42198                   | 33681                   | 80%                       |
| 257 | Speculated 2 (d18:1/20:0)   | 1114.1 / 290.1          | 5927                    | 5899                    | 100%                      |
| 258 | Speculated 2 (d18:1/20:1)   | 1113.1 / 290.1          | 33366                   | 21842                   | 65%                       |
| 259 | Speculated 2 (d18:1/20:2)   | 1112.0 / 290.1          | 63137                   | 54166                   | 86%                       |
| 260 | Speculated 2 (d18:1/20:3)   | 1111.0 / 290.1          | 4052                    | 7439                    | 184%                      |

| No. | Components                  | Q1/Q3<br>( <i>m/z</i> ) | Medium HK-2<br>(counts) | Medium ACHN<br>(counts) | Ratio ACHN to HK-2<br>(%) |
|-----|-----------------------------|-------------------------|-------------------------|-------------------------|---------------------------|
| 261 | Speculated 2 (d18:1/20:4)   | 1110.0 / 290.1          | 4739                    | 6411                    | 135%                      |
| 262 | Speculated 2 (d18:1/20:5)   | 1109.0 / 290.1          | 5427                    | 7379                    | 136%                      |
| 263 | Speculated 2 (d18:1/22:0)   | 1128.1 / 290.1          | 2691                    | 697                     | 26%                       |
| 264 | Speculated 2 (d18:1/22:1)   | 1127.1 / 290.1          | 5039                    | 4755                    | 94%                       |
| 265 | Speculated 2 (d18:1/22:2)   | 1126.1 / 290.1          | 11133                   | 3393                    | 30%                       |
| 266 | Speculated 2 (d18:1/22:3) 1 | 1125.1 / 290.1          | 34650                   | 23678                   | 68%                       |
| 267 | Speculated 2 (d18:1/22:3) 2 | 1125.1 / 290.1          | 54594                   | 53640                   | 98%                       |
| 268 | Speculated 2 (d18:1/22:4)   | 1124.0 / 290.1          | 233796                  | 241133                  | 103%                      |
| 269 | Speculated 2 (d18:1/22:5)   | 1123.0 / 290.1          | 145890                  | 162177                  | 111%                      |
| 270 | Speculated 2 (d18:1/22:6)   | 1122.0 / 290.1          | 10967                   | 12605                   | 115%                      |
| 271 | Speculated 2 (d18:1/24:0)   | 1142.1 / 290.1          | 0                       | 0                       | #DIV/0!                   |
| 272 | Speculated 2 (d18:1/24:1)   | 1141.1 / 290.1          | 3873                    | 4104                    | 106%                      |
| 273 | Speculated 2 (d18:1/26:0)   | 1156.1 / 290.1          | 21137                   | 13065                   | 62%                       |
| 274 | Speculated 2 (d18:1/28:0)   | 1170.1 / 290.1          | 116521                  | 82862                   | 71%                       |
| 275 | Speculated 2 (d18:1/30:0)   | 1184.1 / 290.1          | 3429                    | 3074                    | 90%                       |
| 276 | Total                       |                         | 34269386                | 36805553                | 107%                      |
