# Supplementary material for: Wide-Targeted Semi-Quantitative Analysis of Acidic Glycosphingolipids in Cell Lines and Urine to Develop Potential Screening Biomarkers for Renal Cell Carcinoma
Source: MDPI journal article supplement (doi:10.3390/ijms25074098), 2024-04-07
Supplement: s1 [file s1]

Table S3 Gradient programs for wide-targeted GSLs analysis.

| Time<br>(min) | B<br>(%) | Flow rate<br>(mL/min) |
|---------------|----------|-----------------------|
| 0             | 40       | 0.4                   |
| 40            | 100      | 0.4                   |
| 45            | 100      | 0.4                   |
