# Supplementary material for: Wide-Targeted Semi-Quantitative Analysis of Acidic Glycosphingolipids in Cell Lines and Urine to Develop Potential Screening Biomarkers for Renal Cell Carcinoma
Source: MDPI journal article supplement (doi:10.3390/ijms25074098), 2024-04-07
Supplement: s1 [file s1]

Table S7                      Urinary peak intensity of DSGb5 (d18:1/16:0).

| No | Group | Sample | SEX    | Age<br>(years) | Urinary DSGb5 (d18:1/16:0)<br>(Counts/mg creatinine) |
|----|-------|--------|--------|----------------|------------------------------------------------------|
| 1  | Ctrl  | Ctrl01 | Male   | 21             | 1236                                                 |
| 2  | Ctrl  | Ctrl02 | Male   | 22             | 966                                                  |
| 3  | Ctrl  | Ctrl03 | Male   | 23             | 1193                                                 |
| 4  | Ctrl  | Ctrl04 | Female | 44             | 4002                                                 |
| 5  | Ctrl  | Ctrl05 | Male   | 29             | 4864                                                 |
| 6  | Ctrl  | Ctrl06 | Male   | 47             | 2161                                                 |
| 7  | Ctrl  | Ctrl07 | Male   | 31             | 3573                                                 |
| 8  | Ctrl  | Ctrl08 | Male   | 36             | 9274                                                 |
| 9  | Ctrl  | Ctrl09 | Male   | 36             | 2083                                                 |
| 10 | RCC   | RCC01  | Male   | 73             | 8407                                                 |
| 11 | RCC   | RCC02  | Male   | 58             | 25472                                                |
| 12 | RCC   | RCC03  | Male   | 60             | 9435                                                 |
| 13 | RCC   | RCC04  | Male   | 50             | 9654                                                 |
| 14 | RCC   | RCC05  | Male   | 48             | 18486                                                |
| 15 | RCC   | RCC06  | Male   | 57             | 53786                                                |
| 16 | RCC   | RCC07  | Female | 51             | 16928                                                |
| 17 | RCC   | RCC08  | Male   | 79             | 12202                                                |
| 18 | RCC   | RCC09  | Female | 65             | 8653                                                 |
| 19 | RCC   | RCC10  | Male   | 81             | 14864                                                |
| 20 | RCC   | RCC11  | Male   | 54             | 11437                                                |
| 21 | RCC   | RCC12  | Male   | 48             | 447                                                  |
| 22 | RCC   | RCC13  | Male   | 34             | 3572                                                 |
| 23 | RCC   | RCC14  | Female | 63             | 49332                                                |
| 24 | RCC   | RCC15  | Male   | 56             | 49638                                                |
