# Supplementary material for: Wide-Targeted Semi-Quantitative Analysis of Acidic Glycosphingolipids in Cell Lines and Urine to Develop Potential Screening Biomarkers for Renal Cell Carcinoma
Source: MDPI journal article supplement (doi:10.3390/ijms25074098), 2024-04-07
Supplement: s1 [file s1]

Table S1. SRM transitions for wide-targeted GSLs analysis.

| No. | Glycan | FA carbon<br>(N) | $\Delta$ number<br>(N) | Hex<br>(N) | HexNAc<br>(N) | NeuAc<br>(N) | Fuc<br>(N) | Q1<br>( <i>m/z</i> ) | Q3<br>( <i>m/z</i> ) |
|-----|--------|------------------|------------------------|------------|---------------|--------------|------------|----------------------|----------------------|
| 1   | MSGb5  | 0                | 0                      | 4          | 1             | 1            | 0          | 719.8                | 290.0                |
| 2   | MSGb5  | 16               | 0                      | 4          | 1             | 1            | 0          | 838.9                | 290.0                |
| 3   | MSGb5  | 18               | 3                      | 4          | 1             | 1            | 0          | 849.9                | 290.0                |
| 4   | MSGb5  | 18               | 2                      | 4          | 1             | 1            | 0          | 850.9                | 290.0                |
| 5   | MSGb5  | 18               | 1                      | 4          | 1             | 1            | 0          | 851.9                | 290.0                |
| 6   | MSGb5  | 18               | 0                      | 4          | 1             | 1            | 0          | 853.0                | 290.0                |
| 7   | MSGb5  | 20               | 5                      | 4          | 1             | 1            | 0          | 861.9                | 290.0                |
| 8   | MSGb5  | 20               | 4                      | 4          | 1             | 1            | 0          | 862.9                | 290.0                |
| 9   | MSGb5  | 20               | 3                      | 4          | 1             | 1            | 0          | 863.9                | 290.0                |
| 10  | MSGb5  | 20               | 2                      | 4          | 1             | 1            | 0          | 865.0                | 290.0                |
| 11  | MSGb5  | 20               | 1                      | 4          | 1             | 1            | 0          | 866.0                | 290.0                |
| 12  | MSGb5  | 20               | 0                      | 4          | 1             | 1            | 0          | 867.0                | 290.0                |
| 13  | MSGb5  | 22               | 6                      | 4          | 1             | 1            | 0          | 874.9                | 290.0                |
| 14  | MSGb5  | 22               | 5                      | 4          | 1             | 1            | 0          | 875.9                | 290.0                |
| 15  | MSGb5  | 22               | 4                      | 4          | 1             | 1            | 0          | 877.0                | 290.0                |
| 16  | MSGb5  | 22               | 3                      | 4          | 1             | 1            | 0          | 878.0                | 290.0                |
| 17  | MSGb5  | 22               | 2                      | 4          | 1             | 1            | 0          | 879.0                | 290.0                |
| 18  | MSGb5  | 22               | 1                      | 4          | 1             | 1            | 0          | 880.0                | 290.0                |
| 19  | MSGb5  | 22               | 0                      | 4          | 1             | 1            | 0          | 881.0                | 290.0                |
| 20  | MSGb5  | 24               | 1                      | 4          | 1             | 1            | 0          | 894.0                | 290.0                |

| No. | Glycan | FA carbon<br>(N) | $\Delta$ number<br>(N) | Hex<br>(N) | HexNAc<br>(N) | NeuAc<br>(N) | Fuc<br>(N) | Q1<br>( <i>m/z</i> ) | Q3<br>( <i>m/z</i> ) |
|-----|--------|------------------|------------------------|------------|---------------|--------------|------------|----------------------|----------------------|
| 21  | MSGb5  | 24               | 0                      | 4          | 1             | 1            | 0          | 895.0                | 290.0                |
| 22  | MSGb5  | 26               | 0                      | 4          | 1             | 1            | 0          | 909.0                | 290.0                |
| 23  | MSGb5  | 28               | 0                      | 4          | 1             | 1            | 0          | 923.0                | 290.0                |
| 24  | MSGb5  | 30               | 0                      | 4          | 1             | 1            | 0          | 937.1                | 290.0                |
| 25  | DSGb5  | 0                | 0                      | 4          | 1             | 2            | 0          | 865.4                | 290.0                |
| 26  | DSGb5  | 16               | 0                      | 4          | 1             | 2            | 0          | 984.5                | 290.0                |
| 27  | DSGb5  | 18               | 3                      | 4          | 1             | 2            | 0          | 995.5                | 290.0                |
| 28  | DSGb5  | 18               | 2                      | 4          | 1             | 2            | 0          | 996.5                | 290.0                |
| 29  | DSGb5  | 18               | 1                      | 4          | 1             | 2            | 0          | 997.5                | 290.0                |
| 30  | DSGb5  | 18               | 0                      | 4          | 1             | 2            | 0          | 998.5                | 290.0                |
| 31  | DSGb5  | 20               | 5                      | 4          | 1             | 2            | 0          | 1007.5               | 290.0                |
| 32  | DSGb5  | 20               | 4                      | 4          | 1             | 2            | 0          | 1008.5               | 290.0                |
| 33  | DSGb5  | 20               | 3                      | 4          | 1             | 2            | 0          | 1009.5               | 290.0                |
| 34  | DSGb5  | 20               | 2                      | 4          | 1             | 2            | 0          | 1010.5               | 290.0                |
| 35  | DSGb5  | 20               | 1                      | 4          | 1             | 2            | 0          | 1011.5               | 290.0                |
| 36  | DSGb5  | 20               | 0                      | 4          | 1             | 2            | 0          | 1012.5               | 290.0                |
| 37  | DSGb5  | 22               | 6                      | 4          | 1             | 2            | 0          | 1020.5               | 290.0                |
| 38  | DSGb5  | 22               | 5                      | 4          | 1             | 2            | 0          | 1021.5               | 290.0                |
| 39  | DSGb5  | 22               | 4                      | 4          | 1             | 2            | 0          | 1022.5               | 290.0                |
| 40  | DSGb5  | 22               | 3                      | 4          | 1             | 2            | 0          | 1023.5               | 290.0                |
| 41  | DSGb5  | 22               | 2                      | 4          | 1             | 2            | 0          | 1024.5               | 290.0                |

| No. | Glycan | FA carbon<br>(N) | $\Delta$ number<br>(N) | Hex<br>(N) | HexNAc<br>(N) | NeuAc<br>(N) | Fuc<br>(N) | Q1<br>( <i>m/z</i> ) | Q3<br>( <i>m/z</i> ) |
|-----|--------|------------------|------------------------|------------|---------------|--------------|------------|----------------------|----------------------|
| 42  | DSGb5  | 22               | 1                      | 4          | 1             | 2            | 0          | 1025.5               | 290.0                |
| 43  | DSGb5  | 22               | 0                      | 4          | 1             | 2            | 0          | 1026.5               | 290.0                |
| 44  | DSGb5  | 24               | 1                      | 4          | 1             | 2            | 0          | 1039.5               | 290.0                |
| 45  | DSGb5  | 24               | 0                      | 4          | 1             | 2            | 0          | 1040.6               | 290.0                |
| 46  | DSGb5  | 26               | 0                      | 4          | 1             | 2            | 0          | 1054.6               | 290.0                |
| 47  | DSGb5  | 28               | 0                      | 4          | 1             | 2            | 0          | 1068.6               | 290.0                |
| 48  | DSGb5  | 30               | 0                      | 4          | 1             | 2            | 0          | 1082.6               | 290.0                |
| 49  | GM3    | 0                | 0                      | 2          | 0             | 1            | 0          | 913.5                | 290.0                |
| 50  | GM3    | 16               | 0                      | 2          | 0             | 1            | 0          | 1151.7               | 290.0                |
| 51  | GM3    | 18               | 3                      | 2          | 0             | 1            | 0          | 1173.7               | 290.0                |
| 52  | GM3    | 18               | 2                      | 2          | 0             | 1            | 0          | 1175.7               | 290.0                |
| 53  | GM3    | 18               | 1                      | 2          | 0             | 1            | 0          | 1177.7               | 290.0                |
| 54  | GM3    | 18               | 0                      | 2          | 0             | 1            | 0          | 1179.7               | 290.0                |
| 55  | GM3    | 20               | 5                      | 2          | 0             | 1            | 0          | 1197.7               | 290.0                |
| 56  | GM3    | 20               | 4                      | 2          | 0             | 1            | 0          | 1199.7               | 290.0                |
| 57  | GM3    | 20               | 3                      | 2          | 0             | 1            | 0          | 1201.7               | 290.0                |
| 58  | GM3    | 20               | 2                      | 2          | 0             | 1            | 0          | 1203.7               | 290.0                |
| 59  | GM3    | 20               | 1                      | 2          | 0             | 1            | 0          | 1205.8               | 290.0                |
| 60  | GM3    | 20               | 0                      | 2          | 0             | 1            | 0          | 1207.8               | 290.0                |
| 61  | GM3    | 22               | 6                      | 2          | 0             | 1            | 0          | 1223.7               | 290.0                |
| 62  | GM3    | 22               | 5                      | 2          | 0             | 1            | 0          | 1225.7               | 290.0                |

| No. | Glycan | FA carbon<br>(N) | $\Delta$ number<br>(N) | Hex<br>(N) | HexNAc<br>(N) | NeuAc<br>(N) | Fuc<br>(N) | Q1<br>( <i>m/z</i> ) | Q3<br>( <i>m/z</i> ) |
|-----|--------|------------------|------------------------|------------|---------------|--------------|------------|----------------------|----------------------|
| 63  | GM3    | 22               | 4                      | 2          | 0             | 1            | 0          | 1227.7               | 290.0                |
| 64  | GM3    | 22               | 3                      | 2          | 0             | 1            | 0          | 1229.8               | 290.0                |
| 65  | GM3    | 22               | 2                      | 2          | 0             | 1            | 0          | 1231.8               | 290.0                |
| 66  | GM3    | 22               | 1                      | 2          | 0             | 1            | 0          | 1233.8               | 290.0                |
| 67  | GM3    | 22               | 0                      | 2          | 0             | 1            | 0          | 1235.8               | 290.0                |
| 68  | GM3    | 24               | 1                      | 2          | 0             | 1            | 0          | 1261.8               | 290.0                |
| 69  | GM3    | 24               | 0                      | 2          | 0             | 1            | 0          | 1263.8               | 290.0                |
| 70  | GM3    | 26               | 0                      | 2          | 0             | 1            | 0          | 1291.9               | 290.0                |
| 71  | GM3    | 28               | 0                      | 2          | 0             | 1            | 0          | 1319.9               | 290.0                |
| 72  | GM3    | 30               | 0                      | 2          | 0             | 1            | 0          | 1347.9               | 290.0                |
| 73  | GM2    | 0                | 0                      | 2          | 1             | 1            | 0          | 1116.6               | 290.0                |
| 74  | GM2    | 16               | 0                      | 2          | 1             | 1            | 0          | 1354.8               | 290.0                |
| 75  | GM2    | 18               | 3                      | 2          | 1             | 1            | 0          | 1376.8               | 290.0                |
| 76  | GM2    | 18               | 2                      | 2          | 1             | 1            | 0          | 1378.8               | 290.0                |
| 77  | GM2    | 18               | 1                      | 2          | 1             | 1            | 0          | 1380.8               | 290.0                |
| 78  | GM2    | 18               | 0                      | 2          | 1             | 1            | 0          | 1382.8               | 290.0                |
| 79  | GM2    | 20               | 5                      | 2          | 1             | 1            | 0          | 1400.8               | 290.0                |
| 80  | GM2    | 20               | 4                      | 2          | 1             | 1            | 0          | 1402.8               | 290.0                |
| 81  | GM2    | 20               | 3                      | 2          | 1             | 1            | 0          | 1404.8               | 290.0                |
| 82  | GM2    | 20               | 2                      | 2          | 1             | 1            | 0          | 1406.8               | 290.0                |
| 83  | GM2    | 20               | 1                      | 2          | 1             | 1            | 0          | 1408.8               | 290.0                |

| No. | Glycan      | FA carbon<br>(N) | $\Delta$ number<br>(N) | Hex<br>(N) | HexNAc<br>(N) | NeuAc<br>(N) | Fuc<br>(N) | Q1<br>( <i>m/z</i> ) | Q3<br>( <i>m/z</i> ) |
|-----|-------------|------------------|------------------------|------------|---------------|--------------|------------|----------------------|----------------------|
| 84  | GM2         | 20               | 0                      | 2          | 1             | 1            | 0          | 1410.8               | 290.0                |
| 85  | GM2         | 22               | 6                      | 2          | 1             | 1            | 0          | 1426.8               | 290.0                |
| 86  | GM2         | 22               | 5                      | 2          | 1             | 1            | 0          | 1428.8               | 290.0                |
| 87  | GM2         | 22               | 4                      | 2          | 1             | 1            | 0          | 1430.8               | 290.0                |
| 88  | GM2         | 22               | 3                      | 2          | 1             | 1            | 0          | 1432.8               | 290.0                |
| 89  | GM2         | 22               | 2                      | 2          | 1             | 1            | 0          | 1434.8               | 290.0                |
| 90  | GM2         | 22               | 1                      | 2          | 1             | 1            | 0          | 1436.9               | 290.0                |
| 91  | GM2         | 22               | 0                      | 2          | 1             | 1            | 0          | 1438.9               | 290.0                |
| 92  | GM2         | 24               | 1                      | 2          | 1             | 1            | 0          | 1464.9               | 290.0                |
| 93  | GM2         | 24               | 0                      | 2          | 1             | 1            | 0          | 1466.9               | 290.0                |
| 94  | GM2         | 26               | 0                      | 2          | 1             | 1            | 0          | 1494.9               | 290.0                |
| 95  | GM2         | 28               | 0                      | 2          | 1             | 1            | 0          | 1523.0               | 290.0                |
| 96  | GM2         | 30               | 0                      | 2          | 1             | 1            | 0          | 1551.0               | 290.0                |
| 97  | GM1/DUPAN-2 | 0                | 0                      | 3          | 1             | 1            | 0          | 1278.6               | 290.0                |
| 98  | GM1/DUPAN-2 | 16               | 0                      | 3          | 1             | 1            | 0          | 1516.8               | 290.0                |
| 99  | GM1/DUPAN-2 | 18               | 3                      | 3          | 1             | 1            | 0          | 1538.8               | 290.0                |
| 100 | GM1/DUPAN-2 | 18               | 2                      | 3          | 1             | 1            | 0          | 1540.8               | 290.0                |
| 101 | GM1/DUPAN-2 | 18               | 1                      | 3          | 1             | 1            | 0          | 1542.9               | 290.0                |
| 102 | GM1/DUPAN-2 | 18               | 0                      | 3          | 1             | 1            | 0          | 1544.9               | 290.0                |
| 103 | GM1/DUPAN-2 | 20               | 5                      | 3          | 1             | 1            | 0          | 1562.8               | 290.0                |
| 104 | GM1/DUPAN-2 | 20               | 4                      | 3          | 1             | 1            | 0          | 1564.8               | 290.0                |

| No. | Glycan      | FA carbon<br>(N) | $\Delta$ number<br>(N) | Hex<br>(N) | HexNAc<br>(N) | NeuAc<br>(N) | Fuc<br>(N) | Q1<br>( <i>m/z</i> ) | Q3<br>( <i>m/z</i> ) |
|-----|-------------|------------------|------------------------|------------|---------------|--------------|------------|----------------------|----------------------|
| 105 | GM1/DUPAN-2 | 20               | 3                      | 3          | 1             | 1            | 0          | 1566.9               | 290.0                |
| 106 | GM1/DUPAN-2 | 20               | 2                      | 3          | 1             | 1            | 0          | 1568.9               | 290.0                |
| 107 | GM1/DUPAN-2 | 20               | 1                      | 3          | 1             | 1            | 0          | 1570.9               | 290.0                |
| 108 | GM1/DUPAN-2 | 20               | 0                      | 3          | 1             | 1            | 0          | 1572.9               | 290.0                |
| 109 | GM1/DUPAN-2 | 22               | 6                      | 3          | 1             | 1            | 0          | 1588.8               | 290.0                |
| 110 | GM1/DUPAN-2 | 22               | 5                      | 3          | 1             | 1            | 0          | 1590.9               | 290.0                |
| 111 | GM1/DUPAN-2 | 22               | 4                      | 3          | 1             | 1            | 0          | 1592.9               | 290.0                |
| 112 | GM1/DUPAN-2 | 22               | 3                      | 3          | 1             | 1            | 0          | 1594.9               | 290.0                |
| 113 | GM1/DUPAN-2 | 22               | 2                      | 3          | 1             | 1            | 0          | 1596.9               | 290.0                |
| 114 | GM1/DUPAN-2 | 22               | 1                      | 3          | 1             | 1            | 0          | 1598.9               | 290.0                |
| 115 | GM1/DUPAN-2 | 22               | 0                      | 3          | 1             | 1            | 0          | 1600.9               | 290.0                |
| 116 | GM1/DUPAN-2 | 24               | 1                      | 3          | 1             | 1            | 0          | 1626.9               | 290.0                |
| 117 | GM1/DUPAN-2 | 24               | 0                      | 3          | 1             | 1            | 0          | 1629.0               | 290.0                |
| 118 | GM1/DUPAN-2 | 26               | 0                      | 3          | 1             | 1            | 0          | 1657.0               | 290.0                |
| 119 | GM1/DUPAN-2 | 28               | 0                      | 3          | 1             | 1            | 0          | 1685.0               | 290.0                |
| 120 | GM1/DUPAN-2 | 30               | 0                      | 3          | 1             | 1            | 0          | 1713.1               | 290.0                |
| 121 | GD1a/DSLc4  | 0                | 0                      | 3          | 1             | 2            | 0          | 784.3                | 290.0                |
| 122 | GD1a/DSLc4  | 16               | 0                      | 3          | 1             | 2            | 0          | 903.5                | 290.0                |
| 123 | GD1a/DSLc4  | 18               | 3                      | 3          | 1             | 2            | 0          | 914.5                | 290.0                |
| 124 | GD1a/DSLc4  | 18               | 2                      | 3          | 1             | 2            | 0          | 915.5                | 290.0                |
| 125 | GD1a/DSLc4  | 18               | 1                      | 3          | 1             | 2            | 0          | 916.5                | 290.0                |

| No. | Glycan      | FA carbon<br>(N) | $\Delta$ number<br>(N) | Hex<br>(N) | HexNAc<br>(N) | NeuAc<br>(N) | Fuc<br>(N) | Q1<br>( <i>m/z</i> ) | Q3<br>( <i>m/z</i> ) |
|-----|-------------|------------------|------------------------|------------|---------------|--------------|------------|----------------------|----------------------|
| 126 | GD1a/DSLc4  | 18               | 0                      | 3          | 1             | 2            | 0          | 917.5                | 290.0                |
| 127 | GD1a/DSLc4  | 20               | 5                      | 3          | 1             | 2            | 0          | 926.5                | 290.0                |
| 128 | GD1a/DSLc4  | 20               | 4                      | 3          | 1             | 2            | 0          | 927.5                | 290.0                |
| 129 | GD1a/DSLc4  | 20               | 3                      | 3          | 1             | 2            | 0          | 928.5                | 290.0                |
| 130 | GD1a/DSLc4  | 20               | 2                      | 3          | 1             | 2            | 0          | 929.5                | 290.0                |
| 131 | GD1a/DSLc4  | 20               | 1                      | 3          | 1             | 2            | 0          | 930.5                | 290.0                |
| 132 | GD1a/DSLc4  | 20               | 0                      | 3          | 1             | 2            | 0          | 931.5                | 290.0                |
| 133 | GD1a/DSLc4  | 22               | 6                      | 3          | 1             | 2            | 0          | 939.5                | 290.0                |
| 134 | GD1a/DSLc4  | 22               | 5                      | 3          | 1             | 2            | 0          | 940.5                | 290.0                |
| 135 | GD1a/DSLc4  | 22               | 4                      | 3          | 1             | 2            | 0          | 941.5                | 290.0                |
| 136 | GD1a/DSLc4  | 22               | 3                      | 3          | 1             | 2            | 0          | 942.5                | 290.0                |
| 137 | GD1a/DSLc4  | 22               | 2                      | 3          | 1             | 2            | 0          | 943.5                | 290.0                |
| 138 | GD1a/DSLc4  | 22               | 1                      | 3          | 1             | 2            | 0          | 944.5                | 290.0                |
| 139 | GD1a/DSLc4  | 22               | 0                      | 3          | 1             | 2            | 0          | 945.5                | 290.0                |
| 140 | GD1a/DSLc4  | 24               | 1                      | 3          | 1             | 2            | 0          | 958.5                | 290.0                |
| 141 | GD1a/DSLc4  | 24               | 0                      | 3          | 1             | 2            | 0          | 959.5                | 290.0                |
| 142 | GD1a/DSLc4  | 26               | 0                      | 3          | 1             | 2            | 0          | 973.5                | 290.0                |
| 143 | GD1a/DSLc4  | 28               | 0                      | 3          | 1             | 2            | 0          | 987.6                | 290.0                |
| 144 | GD1a/DSLc4  | 30               | 0                      | 3          | 1             | 2            | 0          | 1001.6               | 290.0                |
| 145 | GalNAcDSLc4 | 0                | 0                      | 3          | 2             | 2            | 0          | 885.9                | 290.0                |
| 146 | GalNAcDSLc4 | 16               | 0                      | 3          | 2             | 2            | 0          | 1005.0               | 290.0                |

| No. | Glycan      | FA carbon<br>(N) | $\Delta$ number<br>(N) | Hex<br>(N) | HexNAc<br>(N) | NeuAc<br>(N) | Fuc<br>(N) | Q1<br>( <i>m/z</i> ) | Q3<br>( <i>m/z</i> ) |
|-----|-------------|------------------|------------------------|------------|---------------|--------------|------------|----------------------|----------------------|
| 147 | GalNAcDSLc4 | 18               | 3                      | 3          | 2             | 2            | 0          | 1016.0               | 290.0                |
| 148 | GalNAcDSLc4 | 18               | 2                      | 3          | 2             | 2            | 0          | 1017.0               | 290.0                |
| 149 | GalNAcDSLc4 | 18               | 1                      | 3          | 2             | 2            | 0          | 1018.0               | 290.0                |
| 150 | GalNAcDSLc4 | 18               | 0                      | 3          | 2             | 2            | 0          | 1019.0               | 290.0                |
| 151 | GalNAcDSLc4 | 20               | 5                      | 3          | 2             | 2            | 0          | 1028.0               | 290.0                |
| 152 | GalNAcDSLc4 | 20               | 4                      | 3          | 2             | 2            | 0          | 1029.0               | 290.0                |
| 153 | GalNAcDSLc4 | 20               | 3                      | 3          | 2             | 2            | 0          | 1030.0               | 290.0                |
| 154 | GalNAcDSLc4 | 20               | 2                      | 3          | 2             | 2            | 0          | 1031.0               | 290.0                |
| 155 | GalNAcDSLc4 | 20               | 1                      | 3          | 2             | 2            | 0          | 1032.0               | 290.0                |
| 156 | GalNAcDSLc4 | 20               | 0                      | 3          | 2             | 2            | 0          | 1033.0               | 290.0                |
| 157 | GalNAcDSLc4 | 22               | 6                      | 3          | 2             | 2            | 0          | 1041.0               | 290.0                |
| 158 | GalNAcDSLc4 | 22               | 5                      | 3          | 2             | 2            | 0          | 1042.0               | 290.0                |
| 159 | GalNAcDSLc4 | 22               | 4                      | 3          | 2             | 2            | 0          | 1043.0               | 290.0                |
| 160 | GalNAcDSLc4 | 22               | 3                      | 3          | 2             | 2            | 0          | 1044.0               | 290.0                |
| 161 | GalNAcDSLc4 | 22               | 2                      | 3          | 2             | 2            | 0          | 1045.0               | 290.0                |
| 162 | GalNAcDSLc4 | 22               | 1                      | 3          | 2             | 2            | 0          | 1046.0               | 290.0                |
| 163 | GalNAcDSLc4 | 22               | 0                      | 3          | 2             | 2            | 0          | 1047.0               | 290.0                |
| 164 | GalNAcDSLc4 | 24               | 1                      | 3          | 2             | 2            | 0          | 1060.1               | 290.0                |
| 165 | GalNAcDSLc4 | 24               | 0                      | 3          | 2             | 2            | 0          | 1061.1               | 290.0                |
| 166 | GalNAcDSLc4 | 26               | 0                      | 3          | 2             | 2            | 0          | 1075.1               | 290.0                |
| 167 | GalNAcDSLc4 | 28               | 0                      | 3          | 2             | 2            | 0          | 1089.1               | 290.0                |



| No. | Glycan      | FA carbon<br>(N) | $\Delta$ number<br>(N) | Hex<br>(N) | HexNAc<br>(N) | NeuAc<br>(N) | Fuc<br>(N) | Q1<br>( <i>m/z</i> ) | Q3<br>( <i>m/z</i> ) |
|-----|-------------|------------------|------------------------|------------|---------------|--------------|------------|----------------------|----------------------|
| 168 | GalNAcDSLc4 | 30               | 0                      | 3          | 2             | 2            | 0          | 1103.1               | 290.0                |
| 169 | CA19-9      | 0                | 0                      | 3          | 1             | 1            | 1          | 1424.7               | 290.0                |
| 170 | CA19-9      | 16               | 0                      | 3          | 1             | 1            | 1          | 1662.9               | 290.0                |
| 171 | CA19-9      | 18               | 3                      | 3          | 1             | 1            | 1          | 1684.9               | 290.0                |
| 172 | CA19-9      | 18               | 2                      | 3          | 1             | 1            | 1          | 1686.9               | 290.0                |
| 173 | CA19-9      | 18               | 1                      | 3          | 1             | 1            | 1          | 1688.9               | 290.0                |
| 174 | CA19-9      | 18               | 0                      | 3          | 1             | 1            | 1          | 1690.9               | 290.0                |
| 175 | CA19-9      | 20               | 5                      | 3          | 1             | 1            | 1          | 1708.9               | 290.0                |
| 176 | CA19-9      | 20               | 4                      | 3          | 1             | 1            | 1          | 1710.9               | 290.0                |
| 177 | CA19-9      | 20               | 3                      | 3          | 1             | 1            | 1          | 1712.9               | 290.0                |
| 178 | CA19-9      | 20               | 2                      | 3          | 1             | 1            | 1          | 1714.9               | 290.0                |
| 179 | CA19-9      | 20               | 1                      | 3          | 1             | 1            | 1          | 1716.9               | 290.0                |
| 180 | CA19-9      | 20               | 0                      | 3          | 1             | 1            | 1          | 1719.0               | 290.0                |
| 181 | CA19-9      | 22               | 6                      | 3          | 1             | 1            | 1          | 1734.9               | 290.0                |
| 182 | CA19-9      | 22               | 5                      | 3          | 1             | 1            | 1          | 1736.9               | 290.0                |
| 183 | CA19-9      | 22               | 4                      | 3          | 1             | 1            | 1          | 1738.9               | 290.0                |
| 184 | CA19-9      | 22               | 3                      | 3          | 1             | 1            | 1          | 1740.9               | 290.0                |
| 185 | CA19-9      | 22               | 2                      | 3          | 1             | 1            | 1          | 1743.0               | 290.0                |
| 186 | CA19-9      | 22               | 1                      | 3          | 1             | 1            | 1          | 1745.0               | 290.0                |
| 187 | CA19-9      | 22               | 0                      | 3          | 1             | 1            | 1          | 1747.0               | 290.0                |
| 188 | CA19-9      | 24               | 1                      | 3          | 1             | 1            | 1          | 1773.0               | 290.0                |

| No. | Glycan       | FA carbon<br>(N) | $\Delta$ number<br>(N) | Hex<br>(N) | HexNAc<br>(N) | NeuAc<br>(N) | Fuc<br>(N) | Q1<br>(m/z) | Q3<br>(m/z) |
|-----|--------------|------------------|------------------------|------------|---------------|--------------|------------|-------------|-------------|
| 189 | CA19-9       | 24               | 0                      | 3          | 1             | 1            | 1          | 1775.0      | 290.0       |
| 190 | CA19-9       | 26               | 0                      | 3          | 1             | 1            | 1          | 1803.1      | 290.0       |
| 191 | CA19-9       | 28               | 0                      | 3          | 1             | 1            | 1          | 1831.1      | 290.0       |
| 192 | CA19-9       | 30               | 0                      | 3          | 1             | 1            | 1          | 1859.1      | 290.0       |
| 193 | Speculated 1 | 0                | 0                      | 5          | 1             | 2            | 0          | 946.4       | 290.0       |
| 194 | Speculated 1 | 16               | 0                      | 5          | 1             | 2            | 0          | 1065.5      | 290.0       |
| 195 | Speculated 1 | 18               | 3                      | 5          | 1             | 2            | 0          | 1076.5      | 290.0       |
| 196 | Speculated 1 | 18               | 2                      | 5          | 1             | 2            | 0          | 1077.5      | 290.0       |
| 197 | Speculated 1 | 18               | 1                      | 5          | 1             | 2            | 0          | 1078.5      | 290.0       |
| 198 | Speculated 1 | 18               | 0                      | 5          | 1             | 2            | 0          | 1079.5      | 290.0       |
| 199 | Speculated 1 | 20               | 5                      | 5          | 1             | 2            | 0          | 1088.5      | 290.0       |
| 200 | Speculated 1 | 20               | 4                      | 5          | 1             | 2            | 0          | 1089.5      | 290.0       |
| 201 | Speculated 1 | 20               | 3                      | 5          | 1             | 2            | 0          | 1090.5      | 290.0       |
| 202 | Speculated 1 | 20               | 2                      | 5          | 1             | 2            | 0          | 1091.5      | 290.0       |
| 203 | Speculated 1 | 20               | 1                      | 5          | 1             | 2            | 0          | 1092.5      | 290.0       |
| 204 | Speculated 1 | 20               | 0                      | 5          | 1             | 2            | 0          | 1093.5      | 290.0       |
| 205 | Speculated 1 | 22               | 6                      | 5          | 1             | 2            | 0          | 1101.5      | 290.0       |
| 206 | Speculated 1 | 22               | 5                      | 5          | 1             | 2            | 0          | 1102.5      | 290.0       |
| 207 | Speculated 1 | 22               | 4                      | 5          | 1             | 2            | 0          | 1103.5      | 290.0       |
| 208 | Speculated 1 | 22               | 3                      | 5          | 1             | 2            | 0          | 1104.5      | 290.0       |
| 209 | Speculated 1 | 22               | 2                      | 5          | 1             | 2            | 0          | 1105.5      | 290.0       |

| No. | Glycan       | FA carbon<br>(N) | $\Delta$ number<br>(N) | Hex<br>(N) | HexNAc<br>(N) | NeuAc<br>(N) | Fuc<br>(N) | Q1<br>( <i>m/z</i> ) | Q3<br>( <i>m/z</i> ) |
|-----|--------------|------------------|------------------------|------------|---------------|--------------|------------|----------------------|----------------------|
| 210 | Speculated 1 | 22               | 1                      | 5          | 1             | 2            | 0          | 1106.6               | 290.0                |
| 211 | Speculated 1 | 22               | 0                      | 5          | 1             | 2            | 0          | 1107.6               | 290.0                |
| 212 | Speculated 1 | 24               | 1                      | 5          | 1             | 2            | 0          | 1120.6               | 290.0                |
| 213 | Speculated 1 | 24               | 0                      | 5          | 1             | 2            | 0          | 1121.6               | 290.0                |
| 214 | Speculated 1 | 26               | 0                      | 5          | 1             | 2            | 0          | 1135.6               | 290.0                |
| 215 | Speculated 1 | 28               | 0                      | 5          | 1             | 2            | 0          | 1149.6               | 290.0                |
| 216 | Speculated 1 | 30               | 0                      | 5          | 1             | 2            | 0          | 1163.6               | 290.0                |
| 217 | Speculated 2 | 0                | 0                      | 4          | 2             | 2            | 0          | 966.9                | 290.0                |
| 218 | Speculated 2 | 16               | 0                      | 4          | 2             | 2            | 0          | 1086.0               | 290.0                |
| 219 | Speculated 2 | 18               | 3                      | 4          | 2             | 2            | 0          | 1097.0               | 290.0                |
| 220 | Speculated 2 | 18               | 2                      | 4          | 2             | 2            | 0          | 1098.0               | 290.0                |
| 221 | Speculated 2 | 18               | 1                      | 4          | 2             | 2            | 0          | 1099.0               | 290.0                |
| 222 | Speculated 2 | 18               | 0                      | 4          | 2             | 2            | 0          | 1100.0               | 290.0                |
| 223 | Speculated 2 | 20               | 5                      | 4          | 2             | 2            | 0          | 1109.0               | 290.0                |
| 224 | Speculated 2 | 20               | 4                      | 4          | 2             | 2            | 0          | 1110.0               | 290.0                |
| 225 | Speculated 2 | 20               | 3                      | 4          | 2             | 2            | 0          | 1111.0               | 290.0                |
| 226 | Speculated 2 | 20               | 2                      | 4          | 2             | 2            | 0          | 1112.0               | 290.0                |
| 227 | Speculated 2 | 20               | 1                      | 4          | 2             | 2            | 0          | 1113.1               | 290.0                |
| 228 | Speculated 2 | 20               | 0                      | 4          | 2             | 2            | 0          | 1114.1               | 290.0                |
| 229 | Speculated 2 | 22               | 6                      | 4          | 2             | 2            | 0          | 1122.0               | 290.0                |
| 230 | Speculated 2 | 22               | 5                      | 4          | 2             | 2            | 0          | 1123.0               | 290.0                |

| No. | Glycan       | FA carbon<br>(N) | $\Delta$ number<br>(N) | Hex<br>(N) | HexNAc<br>(N) | NeuAc<br>(N) | Fuc<br>(N) | Q1<br>( <i>m/z</i> ) | Q3<br>( <i>m/z</i> ) |
|-----|--------------|------------------|------------------------|------------|---------------|--------------|------------|----------------------|----------------------|
| 231 | Speculated 2 | 22               | 4                      | 4          | 2             | 2            | 0          | 1124.0               | 290.0                |
| 232 | Speculated 2 | 22               | 3                      | 4          | 2             | 2            | 0          | 1125.1               | 290.0                |
| 233 | Speculated 2 | 22               | 2                      | 4          | 2             | 2            | 0          | 1126.1               | 290.0                |
| 234 | Speculated 2 | 22               | 1                      | 4          | 2             | 2            | 0          | 1127.1               | 290.0                |
| 235 | Speculated 2 | 22               | 0                      | 4          | 2             | 2            | 0          | 1128.1               | 290.0                |
| 236 | Speculated 2 | 24               | 1                      | 4          | 2             | 2            | 0          | 1141.1               | 290.0                |
| 237 | Speculated 2 | 24               | 0                      | 4          | 2             | 2            | 0          | 1142.1               | 290.0                |
| 238 | Speculated 2 | 26               | 0                      | 4          | 2             | 2            | 0          | 1156.1               | 290.0                |
| 239 | Speculated 2 | 28               | 0                      | 4          | 2             | 2            | 0          | 1170.1               | 290.0                |
| 240 | Speculated 2 | 30               | 0                      | 4          | 2             | 2            | 0          | 1184.1               | 290.0                |
