# Supplementary material for: Wide-Targeted Semi-Quantitative Analysis of Acidic Glycosphingolipids in Cell Lines and Urine to Develop Potential Screening Biomarkers for Renal Cell Carcinoma
Source: MDPI journal article supplement (doi:10.3390/ijms25074098), 2024-04-07
Supplement: s1 [file s1]

Table S8 Demographics of healthy controls and RCC patients.

| Group                 | Healthy controls | RCC patients    | <i>P</i> values |
|-----------------------|------------------|-----------------|-----------------|
| Number of samples (n) | 9                | 15              |                 |
| Male (%)              | 11.1             | 20.0            | 0.5716          |
| Mean $\pm$ SD (years) | 32.1 $\pm$ 3.82  | 58.5 $\pm$ 2.96 | <0.001          |

RCC, renal cell carcinoma.
