# Supplementary material for: Wide-Targeted Semi-Quantitative Analysis of Acidic Glycosphingolipids in Cell Lines and Urine to Develop Potential Screening Biomarkers for Renal Cell Carcinoma
Source: Int J Mol Sci. 2024 Apr 7;25(7):4098. doi: 10.3390/ijms25074098 (PMC11012862; doi:10.3390/ijms25074098)
Supplement: Supplementary file 1 [file ijms-25-04098-s001.zip]

Archive with 9 entries (9 files):
- Figs_S_2.0.pptx
- TableS1_1.6.pdf
- TableS2_1.6.pdf
- TableS3_1.6.pdf
- TableS4_2.0.pdf
- TableS5_2.0.pdf
- TableS6_2.0.pdf
- TableS7_2.0.pdf
- TableS8_2.0.pdf
